# Supplementary material for: Intensification characteristics of hydroclimatic extremes in the Asian monsoon region under 1.5 and 2.0 °C of global warming
Source: Copernicus journal article supplement (doi:10.5194/hess-24-5799-2020), 2020-12-07
Supplement: Supplementary file 1 [file hess-24-5799-2020-supplement.zip]

Archive with 10 entries (10 files):
- 02_Supplement_HESS_R4_F.pdf
- Fig_S3.tif
- Fig_S6.tif
- hess-24-5799-2020-supplement-title-page.pdf
- Fig_S5.tif
- Fig_S8.tif
- Fig_S4.tif
- Fig_S2.tif
- Fig_S1.tif
- Fig_S7.tif
