# Supplementary material for: Intensification characteristics of hydroclimatic extremes in the Asian monsoon region under 1.5 and 2.0 °C of global warming
Source: Copernicus journal article supplement (doi:10.5194/hess-24-5799-2020), 2020-12-07
Supplement: Supplementary file 1 [file hess-24-5799-2020-supplement.zip › 02_Supplement_HESS_R4_F.pdf]

*Supplement of*

## **Intensification characteristics of hydroclimatic extremes in the Asia monsoon region under 1.5 and 2.0 °C of global warming**

5 Jeong-Bae Kim<sup>1</sup>, Deg-Hyo Bae<sup>1</sup>

<sup>1</sup> Department of Civil and Environmental Engineering, Sejong University, Seoul, 05006, Korea

*Correspondence to:* Deg-Hyo Bae (dhbae@sejong.ac.kr)

### 10 **Contents of this file**

Table S1, S2

Figures S1, S2, S3, S4, S5, S6, S7, S8

## 15 **Table Captions**

Table S1. Results of the GCM evaluations based on the skill scores of 12 climate variables (pr: precipitation, tas: mean near-surface air temperature, tasmax: maximum near-surface air temperature, tasmin: minimum near-surface air temperature, rlut: outgoing longwave radiation, psl: sea level pressure, tos: sea surface temperature, ta: air temperature, zg: geopotential height, hus: specific humidity, ua: zonal wind, and va: meridional wind).

20 Table S2. Statistical results of the VIC model validation for the selected basins in this study.

**Table S1. Results of the GCM evaluations based on the skill scores of 12 climate variables (pr: precipitation, tas: mean near-surface air temperature, tasmax: maximum near-surface air temperature, tasmin: minimum near-surface air temperature, rlut: outgoing longwave radiation, psl: sea level pressure, tos: sea surface temperature, ta: air temperature, zg: geopotential height, hus: specific humidity, ua: zonal wind, and va: meridional wind).**

| No. | GCMs           | Score of each variable |     |         |         |      |     |     |    |    |     |    |    | Total score | Rank | Select (O,X) |
|-----|----------------|------------------------|-----|---------|---------|------|-----|-----|----|----|-----|----|----|-------------|------|--------------|
|     |                | pr                     | Tas | tas max | tas min | rlut | psl | tos | ta | zg | hus | ua | va |             |      |              |
| 1   | ACCESS1.0      | 1                      | -1  | 1       | 0       | 1    | -1  | 0   | 1  | -1 | -1  | 1  | 1  | 2           | 8    | X            |
| 2   | ACCESS1.3      | -1                     | -1  | -1      | 1       | 0    | -1  | 0   | 1  | -1 | -1  | 1  | 1  | -2          | 13   | X            |
| 3   | bcc-csm1-1     | -1                     | 1   | -1      | -1      | -1   | 1   | 0   | -1 | 1  | 1   | 0  | 0  | -1          | 12   | X            |
| 4   | bcc-csm1-1-m   | 1                      | 1   | 1       | 1       | 1    | 1   | 0   | 1  | 1  | 1   | -1 | 1  | 9           | 2    | O            |
| 5   | BNU-ESM        | 1                      | 1   | -1      | -1      | 1    | 1   | 1   | -1 | 1  | 1   | -1 | 0  | 3           | 7    | X            |
| 6   | CanESM2        | 1                      | 1   | -1      | -1      | 1    | -1  | 1   | 1  | 1  | 1   | 1  | 1  | 6           | 5    | O            |
| 7   | CMCC-CM        | -1                     | 1   | 1       | 1       | 0    | -1  | 0   | 1  | 1  | 1   | 1  | 1  | 6           | 6    | X            |
| 8   | CMCC-CMS       | 1                      | 1   | 1       | 1       | 0    | -1  | 0   | 1  | 1  | 1   | 1  | 1  | 8           | 4    | O            |
| 9   | CNRM-CM5       | 1                      | 1   | 1       | -1      | 1    | 1   | 0   | 1  | 1  | 1   | 1  | 1  | 9           | 3    | O            |
| 10  | GFDL-CM3       | 1                      | -1  | 1       | 1       | 1    | -1  | 0   | 1  | -1 | -1  | 1  | 0  | 2           | 9    | X            |
| 11  | GFDL-ESM2G     | 0                      | -1  | 1       | -1      | 1    | -1  | 0   | -1 | -1 | -1  | 1  | 1  | -2          | 14   | X            |
| 12  | HadGEM2-CC     | 1                      | -1  | 1       | 1       | 1    | -1  | 1   | -1 | -1 | -1  | -1 | 1  | 0           | 11   | X            |
| 13  | IPSL-CM5A-LR   | -1                     | -1  | 0       | 1       | -1   | 0   | 0   | 1  | -1 | -1  | -1 | -1 | -5          | 16   | X            |
| 14  | IPSL-CM5A-MR   | -1                     | -1  | 1       | 1       | -1   | 0   | 0   | 1  | -1 | -1  | 0  | -1 | -3          | 15   | X            |
| 15  | IPSL-CM5B-LR   | -1                     | -1  | -1      | -1      | -1   | 0   | 0   | -1 | -1 | -1  | -1 | -1 | -10         | 19   | X            |
| 16  | MIROC-ESM      | -1                     | -1  | -1      | -1      | 0    | 0   | 1   | -1 | -1 | -1  | -1 | -1 | -8          | 18   | X            |
| 17  | MIROC-ESM-CHEM | -1                     | -1  | -1      | -1      | 1    | 0   | 1   | -1 | -1 | -1  | -1 | -1 | -7          | 17   | X            |
| 18  | MRI-CGCM3      | -1                     | -1  | 0       | 1       | -1   | 1   | 1   | 1  | -1 | -1  | 1  | 1  | 1           | 10   | X            |
| 19  | NorESM1-M      | 0                      | 1   | 1       | 1       | 1    | 1   | 1   | 1  | 1  | 1   | 1  | 0  | 10          | 1    | O            |

**Table S2. Statistical results of the VIC model validation for the selected basins in this study.**

| No. | Basin         | Station         | Area<br>(km <sup>2</sup> ) | Statistics |      |                    |        |
|-----|---------------|-----------------|----------------------------|------------|------|--------------------|--------|
|     |               |                 |                            | CC         | ME   | RMSE<br>(mm/month) | VE (%) |
| 1   | Tone          | Fukawa          | 12,458                     | 0.91       | 0.68 | 24.6               | 33.6   |
| 2   | Yodo          | Hirakata        | 7,281                      | 0.87       | 0.75 | 28.6               | -8.3   |
| 3   | Bolshaya Bira | Birobidzhan     | 2,910                      | 0.84       | 0.58 | 22.5               | 24.4   |
| 4   | Piryu-Gang    | Songchon        | 1,878                      | 0.83       | 0.65 | 32.9               | 8.1    |
| 5   | Chung-Ju      | Chung-Ju dam    | 6,662                      | 0.95       | 0.88 | 32.3               | 16.1   |
| 6   | Geum          | Yong-dam dam    | 9,912                      | 0.93       | 0.83 | 4.7                | 23.4   |
| 7   | Nam-Gang      | Sam Dung        | 2,727                      | 0.86       | 0.71 | 26.2               | -10.7  |
| 8   | Laoguan He    | Xixia           | 3,418                      | 0.65       | 0.39 | 19.7               | -14.3  |
| 9   | Huai He       | Changtaiguan    | 3,090                      | 0.90       | 0.78 | 22.9               | 28.4   |
| 10  | Gan Jiang     | Jian            | 56,200                     | 0.93       | 0.84 | 26.8               | -12.5  |
| 11  | Dong Jiang    | Boluo           | 25,325                     | 0.89       | 0.78 | 23.7               | -3.9   |
| 12  | Muar          | Buluh Kasap     | 3,130                      | 0.58       | 0.33 | 62.0               | 9.2    |
| 13  | Siem Pang     | Sekong          | 28,227                     | 0.80       | 0.42 | 102.4              | -40.1  |
| 14  | Wu Jiang      | Gongtan         | 58,300                     | 0.97       | 0.86 | 14.8               | -18.3  |
| 15  | Han Shui      | Ankang          | 41,400                     | 0.95       | 0.84 | 17.7               | 15.8   |
| 16  | Lam Chi       | Yasothon        | 431,000                    | 0.77       | 0.42 | 36.6               | 15.4   |
| 17  | Nan           | Ban Bum Nak     | 11,619                     | 0.88       | 0.67 | 19.4               | -25.7  |
| 18  | Mekong        | Chiang saen     | 189,000                    | 0.70       | 0.41 | 18.5               | -11.7  |
| 19  | Brahmaputra   | Bahadurabad     | 636,140                    | 0.88       | 0.65 | 29.4               | -26.6  |
| 20  | Ganges        | Hardinge Bridge | 846,300                    | 0.86       | 0.59 | 29.3               | -32.2  |

## Figure Captions

Figure S1: 30-year moving averages of the global mean temperature (unit: °C) under RCP4.5 and RCP8.5. The thick solid lines and shadings indicate the values derived from the MME and the range of the 5 selected GCMs, respectively. Horizontal arrows indicate the periods of each global warming condition under different RCP scenarios. Closed (open) circles on the lines denote the central year of each global warming period derived from the MME (based on the 5 GCMs).

Figure S2: Twenty river basins (denoted by (1)-(20), which correspond to the numbers in Table S2) used for validating the VIC model in this study. The countries within the study area are delineated by black lines and white shading, and each basin is outlined by a blue line with various colors. Green circles denote the Global Runoff Data Centre (GRDC) stations located in the outlets of the twenty individual river basins.

Figure S3: Time series of measured runoff (gray dashed line) and simulated runoff (black solid line) on a monthly basis averaged at each grid in the six river basins (denoted by Basin (No.)) among the twenty basins corresponding to the labels in Figure S2. The simulated runoff is obtained from the VIC model fed by observational meteorological inputs (unit: mm). The blue bars along the upper x-axis indicate the mean area-averaged precipitation in each grid within the six individual river basins.

Figure S4: (a) Scatter plot of measured monthly maximum runoff and simulated monthly maximum runoff from the VIC model fed by observational meteorological input for all cases in the selected 20 basins (ALL: gray circles) and averages of all cases in each basin (AVE: blue circles) and (b) box-whisker plot of measured monthly maximum runoff (denoted by OBS on the x-axis) and simulated monthly maximum runoff (denoted by SIM on the x-axis) in the 20 basins (unit: mm). (c) Box-whisker plot of the standard deviation of the observed monthly maximum runoff for all cases (denoted by OBS-STD on the x-axis) and the biases between OBS and SIM (denoted by BIAS on the x-axis).

Figure S5: Spatial distributions of the (a) annual minimum temperature (unit: °C) and (b) annual maximum temperature (unit: °C) for the historical period (1976-2005) in the Asian monsoon region. OBS and MME denote the values obtained from the observational temperature dataset and the MME of bias-corrected outputs from the five GCMs, respectively. BIAS (i.e., the 3rd column in each row) represents the percentage bias in individual variables between OBS and MME.

Figure S6: Spatial distributions of the (a) annual mean runoff (unit: mm) and (b) daily maximum runoff (unit: mm/day) for the historical period (1976-2005) in the Asian monsoon region. OBS denotes the simulated runoff from the VIC model fed by observational precipitation data (i.e., APHRODITE). MME denotes the simulated runoff from the VIC model fed by the MME of the bias-corrected outputs from the five GCMs. BIAS (i.e., the 3rd column in each row) represents the percentage bias in individual variables between OBS and MME.

Figure S7: (a) Relative changes in the annual maximum precipitation (PX1D) derived from the MME of the five GCMs under 1.5 °C and 2.0 °C of global warming forced by RCP8.5 compared to the reference period (REF). (b) Scatter plot for a comparison of the relative changes between the maximum precipitation over 2, 3, and 5 consecutive days (PX2D, PX3D, and PX5D, respectively) and the annual maximum precipitation (PX1D) derived from the MME over the Asian monsoon region. Each blue diamond (orange circle) in (b) indicates the relationship between the variable on the x-axis and the variable on the y-axis for an individual grid value within the region under 1.5 °C (2.0 °C) of global warming.

Figure S8: Spatial distributions of the MME for three extreme climate indices (MDF, DWF07, and DWF30) under RCP8.5 over the study domain. Relative changes in the (a) annual maximum runoff (MDF), (b) consecutive 7-day minimum runoff (DWF07), and (c) consecutive 30-day minimum runoff (DWF30) under 1.5 °C and 2.0 °C of global warming compared to the reference period (REF). The green (i.e., located in the Cf zone), purple (i.e., located in the Aw zone), and yellow (i.e., located in the Bw zone) rectangles indicate the locations of regions susceptible to DWF07 and DWF30 under global warming.

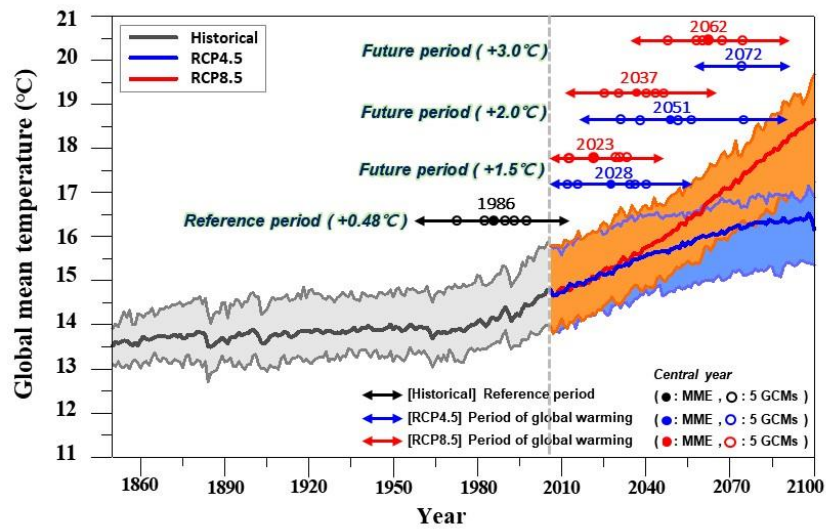

Figure S1: 30-year moving averages of the global mean temperature (unit: °C) under RCP4.5 and RCP8.5. The thick solid lines and shadings indicate the values derived from the MME and the range of the 5 selected GCMs, respectively. Horizontal arrows indicate the periods of each global warming condition under different RCP scenarios. Closed (open) circles on the lines denote the central year of each global warming period derived from the MME (based on the 5 GCMs).

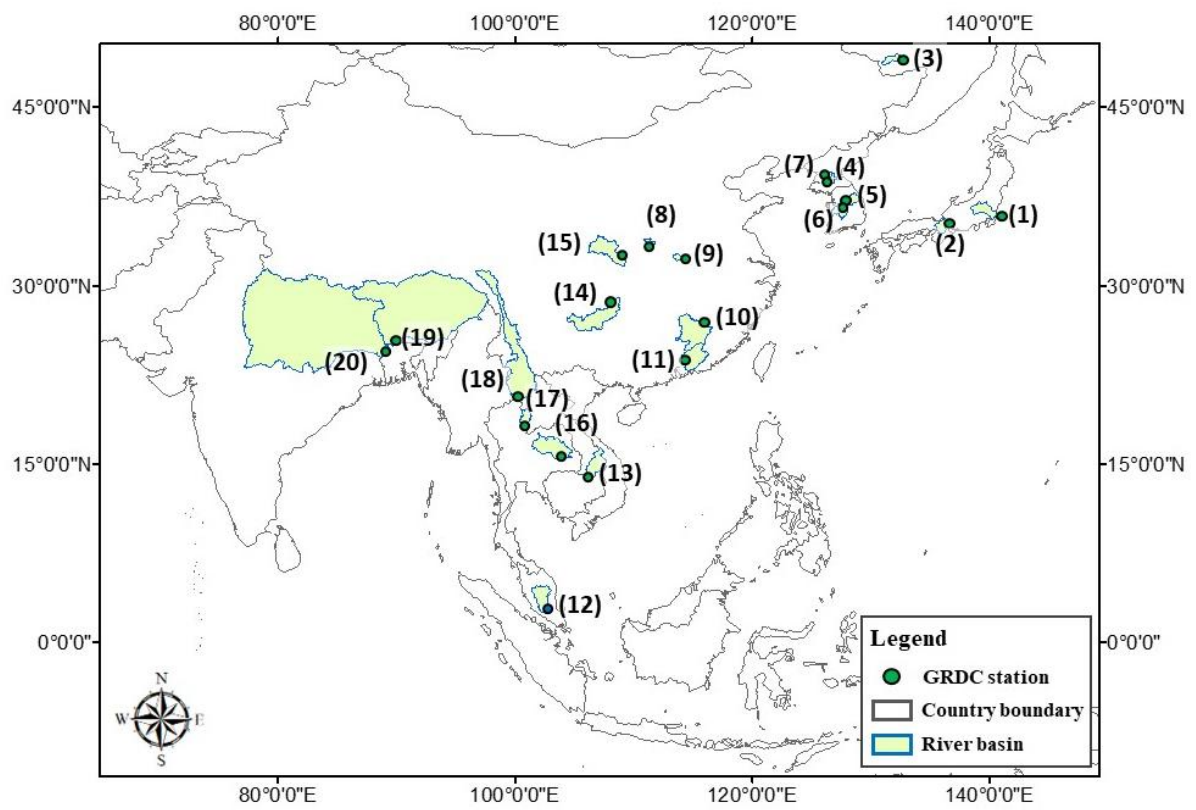

**Figure S2:** Twenty river basins (denoted by (1)-(20), which correspond to the numbers in Table S2) used for validating the VIC model in this study. The countries within the study area are delineated by black lines and white shading, and each basin is outlined by a blue line with various colors. Green circles denote the Global Runoff Data Centre (GRDC) stations located in the outlets of the twenty individual river basins.

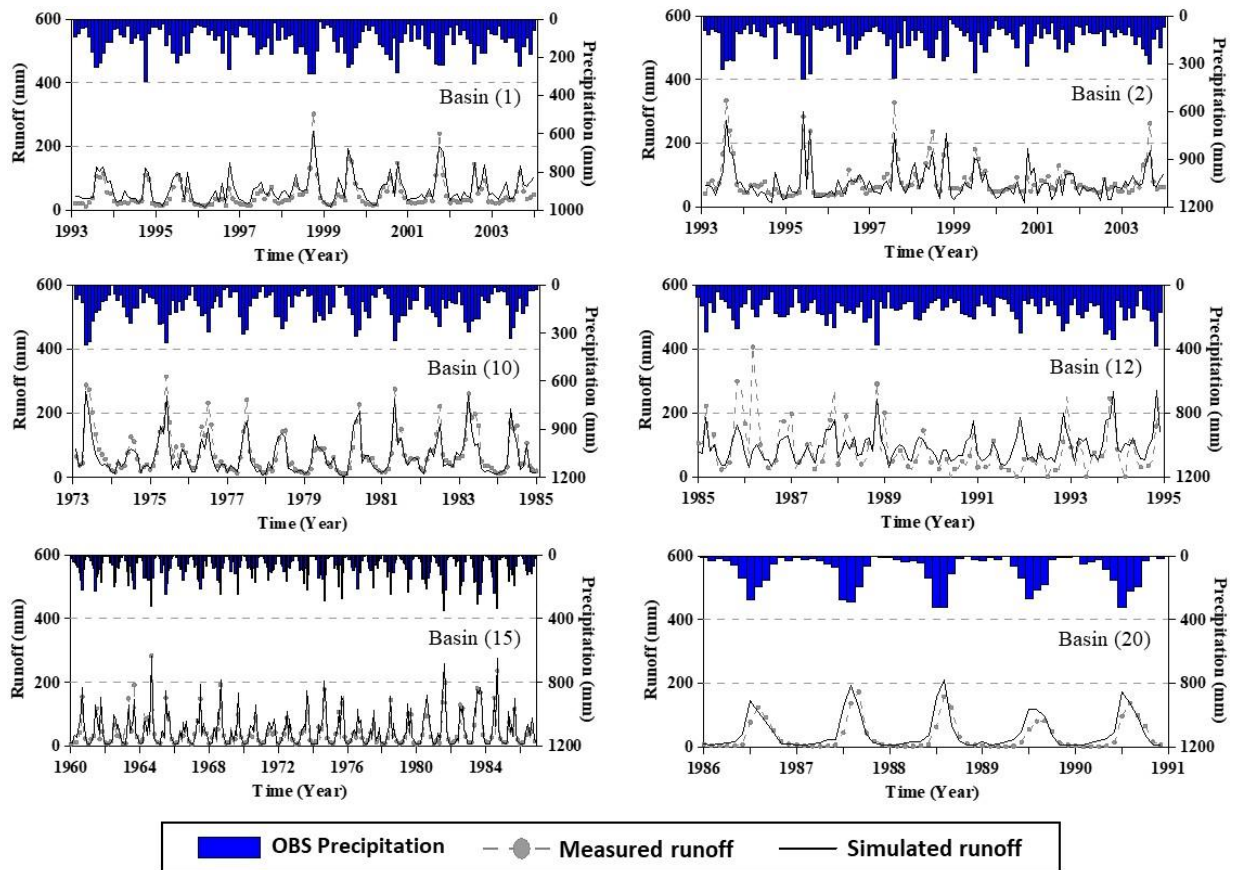

Figure S3: Time series of measured runoff (gray dashed line) and simulated runoff (black solid line) on a monthly basis averaged at each grid in the six river basins (denoted by Basin (No.)) among the twenty basins corresponding to the labels in Figure S2. The simulated runoff is obtained from the VIC model fed by observational meteorological inputs (unit: mm). The blue bars along the upper x-axis indicate the mean area-averaged precipitation in each grid within the six individual river basins.

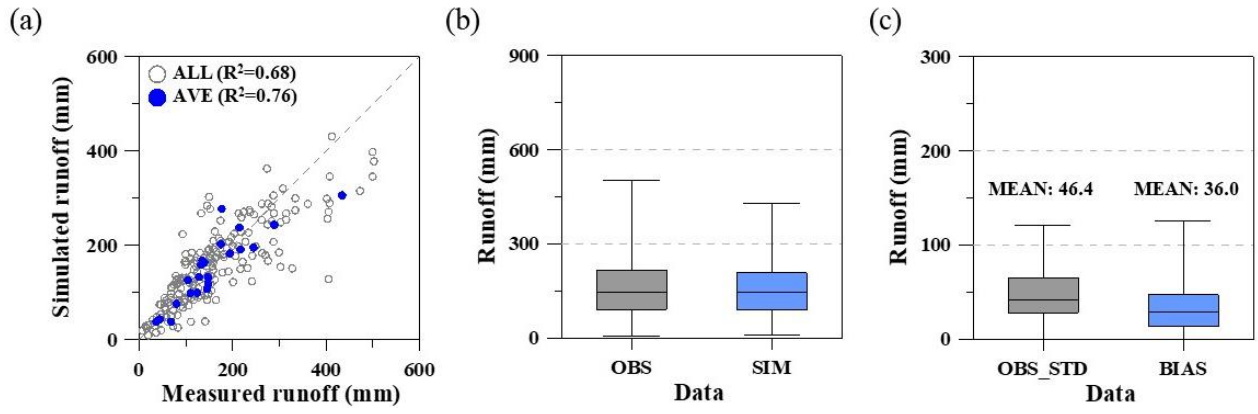

90 **Figure S4: (a) Scatter plot of measured monthly maximum runoff and simulated monthly maximum runoff from the VIC model fed**  
**by observational meteorological input for all cases in the selected 20 basins (ALL: gray circles) and averages of all cases in each**  
**basin (AVE: blue circles) and (b) box-whisker plot of measured monthly maximum runoff (denoted by OBS on the x-axis) and**  
**simulated monthly maximum runoff (denoted by SIM on the x-axis) in the 20 basins (unit: mm). (c) Box-whisker plot of the**  
95 **standard deviation of the observed monthly maximum runoff for all cases (denoted by OBS-STD on the x-axis) and the biases**  
**between OBS and SIM (denoted by BIAS on the x-axis).**

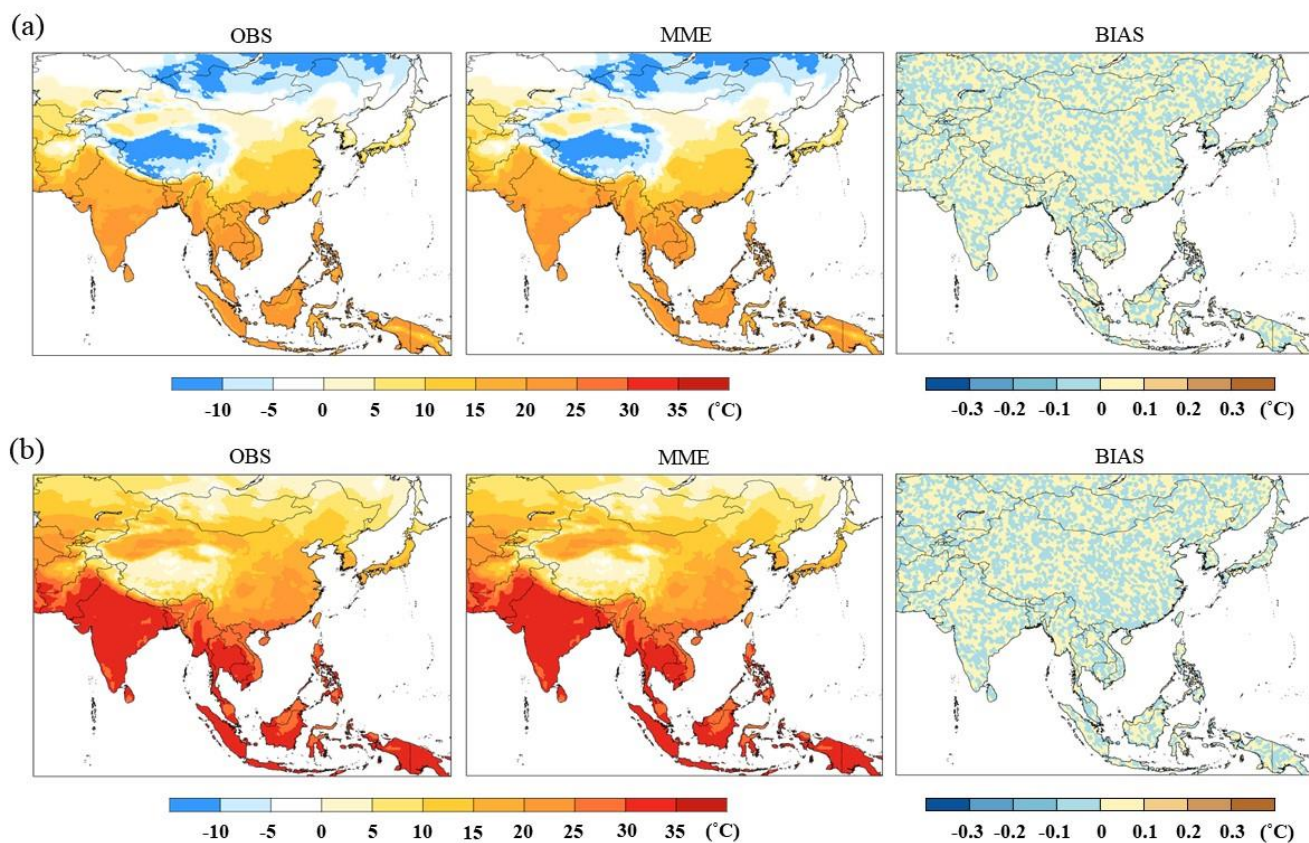

**Figure S5: Spatial distributions of the (a) annual minimum temperature (unit: °C) and (b) annual maximum temperature (unit: °C) for the historical period (1976-2005) in the Asian monsoon region. OBS and MME denote the values obtained from the observational temperature dataset and the MME of bias-corrected outputs from the five GCMs, respectively. BIAS (i.e., the 3<sup>rd</sup> column in each row) represents the percentage bias in individual variables between OBS and MME.**

100

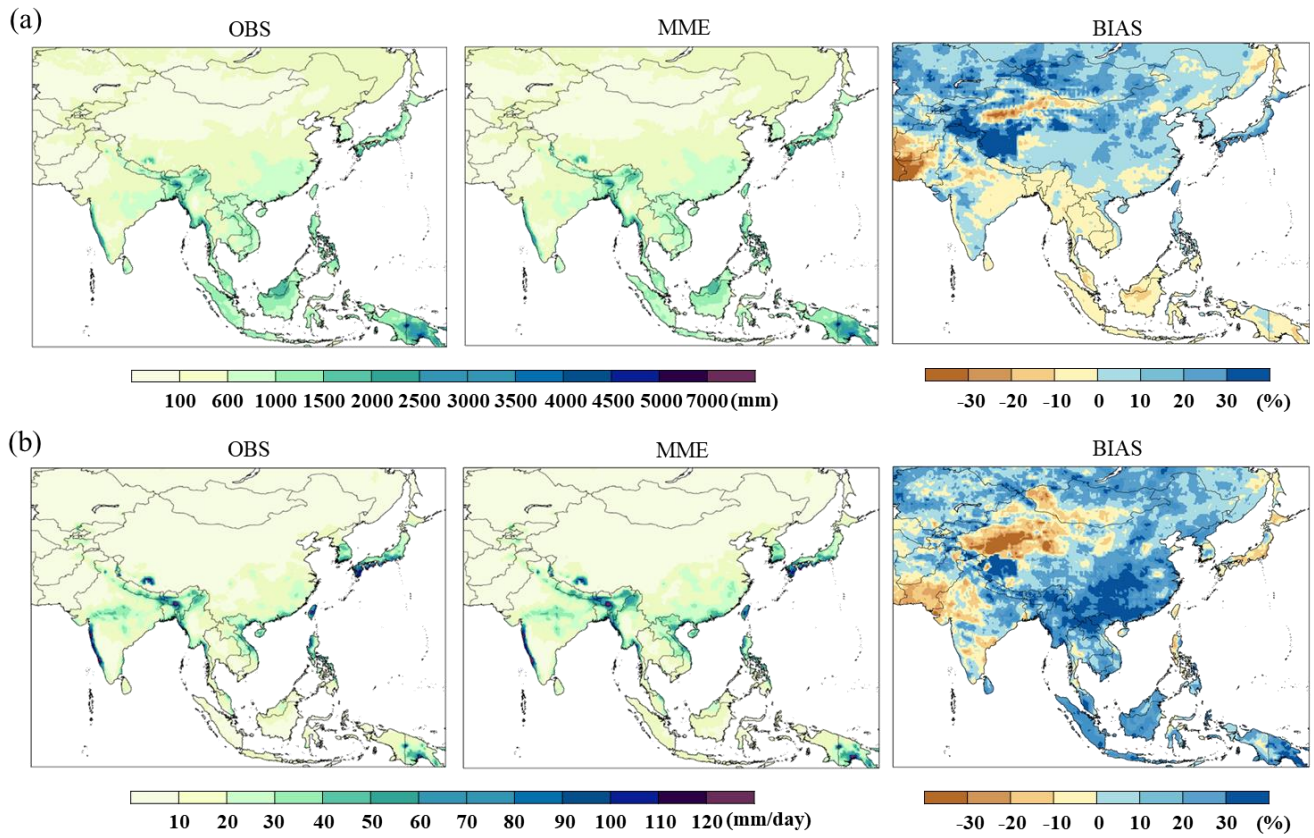

105 **Figure S6: Spatial distributions of the (a) annual mean runoff (unit: mm) and (b) daily maximum runoff (unit: mm/day) for the**  
**historical period (1976-2005) in the Asian monsoon region. OBS denotes the simulated runoff from the VIC model fed by**  
**observational precipitation data (i.e., APHRODITE). MME denotes the simulated runoff from the VIC model fed by the MME of**  
**the bias-corrected outputs from the five GCMs. BIAS (i.e., the 3<sup>rd</sup> column in each row) represents the percentage bias in individual**  
**variables between OBS and MME.**

110

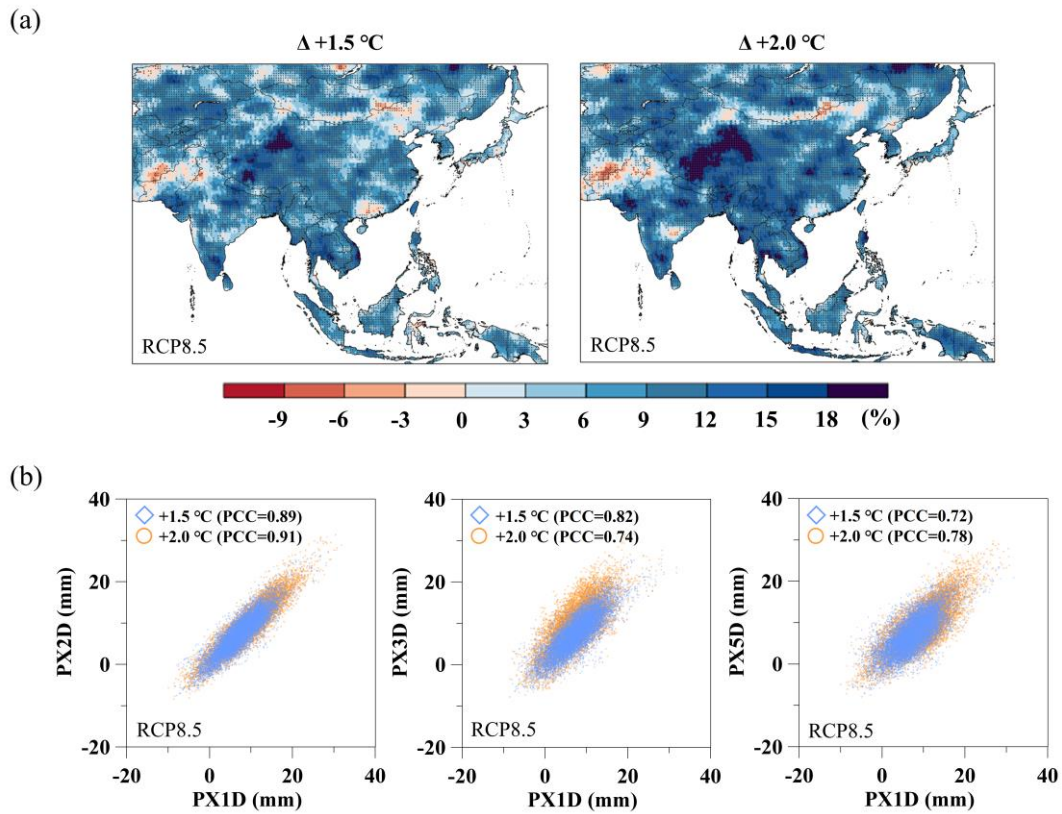

Figure S7: (a) Relative changes in the annual maximum precipitation (PX1D) derived from the MME of the five GCMs under 1.5 °C and 2.0 °C of global warming forced by RCP8.5 compared to the reference period (REF). (b) Scatter plot for a comparison of the relative changes between the maximum precipitation over 2, 3, and 5 consecutive days (PX2D, PX3D, and PX5D, respectively) and the annual maximum precipitation (PX1D) derived from the MME over the Asian monsoon region. Each blue diamond (orange circle) in (b) indicates the relationship between the variable on the x-axis and the variable on the y-axis for an individual grid value within the region under 1.5 °C (2.0 °C) of global warming.

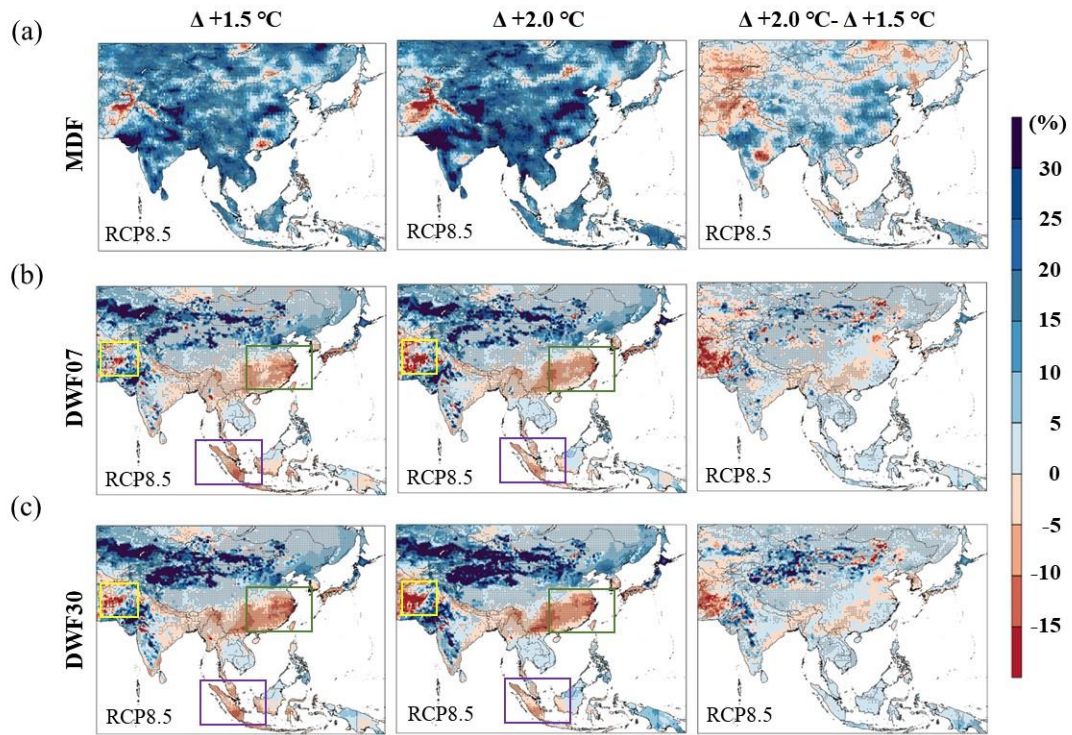

**Figure S8:** Spatial distributions of the MME for three extreme climate indices (MDF, DWF07, and DWF30) under RCP8.5 over the study domain. Relative changes in the (a) annual maximum runoff (MDF), (b) consecutive 7-day minimum runoff (DWF07), and (c) consecutive 30-day minimum runoff (DWF30) under 1.5 °C and 2.0 °C of global warming compared to the reference period (REF). The green (i.e., located in the Cf zone), purple (i.e., located in the Aw zone), and yellow (i.e., located in the Bw zone) rectangles indicate the locations of regions susceptible to DWF07 and DWF30 under global warming.
