# Supplementary material for: Intensification characteristics of hydroclimatic extremes in the Asian monsoon region under 1.5 and 2.0 °C of global warming
Source: Copernicus journal article supplement (doi:10.5194/hess-24-5799-2020), 2020-12-07
Supplement: Supplementary file 1 [file hess-24-5799-2020-supplement.zip › hess-24-5799-2020-supplement-title-page.pdf]

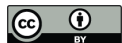

## *Supplement of*

# **Intensification characteristics of hydroclimatic extremes in the Asian monsoon region under 1.5 and 2.0 °C of global warming**

**Jeong-Bae Kim and Deg-Hyo Bae**

*Correspondence to:* Deg-Hyo Bae (dhbae@sejong.ac.kr)

- hess-24-5799-2020-supplement-title-page.pdf
- 02\_Supplement\_HESS\_R4\_F.pdf
- Fig\_S1.tif
- Fig\_S2.tif
- Fig\_S3.tif
- Fig\_S4.tif
- Fig\_S5.tif
- Fig\_S6.tif
- Fig\_S7.tif
- Fig\_S8.tif

The copyright of individual parts of the supplement might differ from the CC BY 4.0 License.
