# Supplementary figures and images for: Intensification characteristics of hydroclimatic extremes in the Asian monsoon region under 1.5 and 2.0 °C of global warming
Source: Copernicus journal article supplement (doi:10.5194/hess-24-5799-2020), 2020-12-07

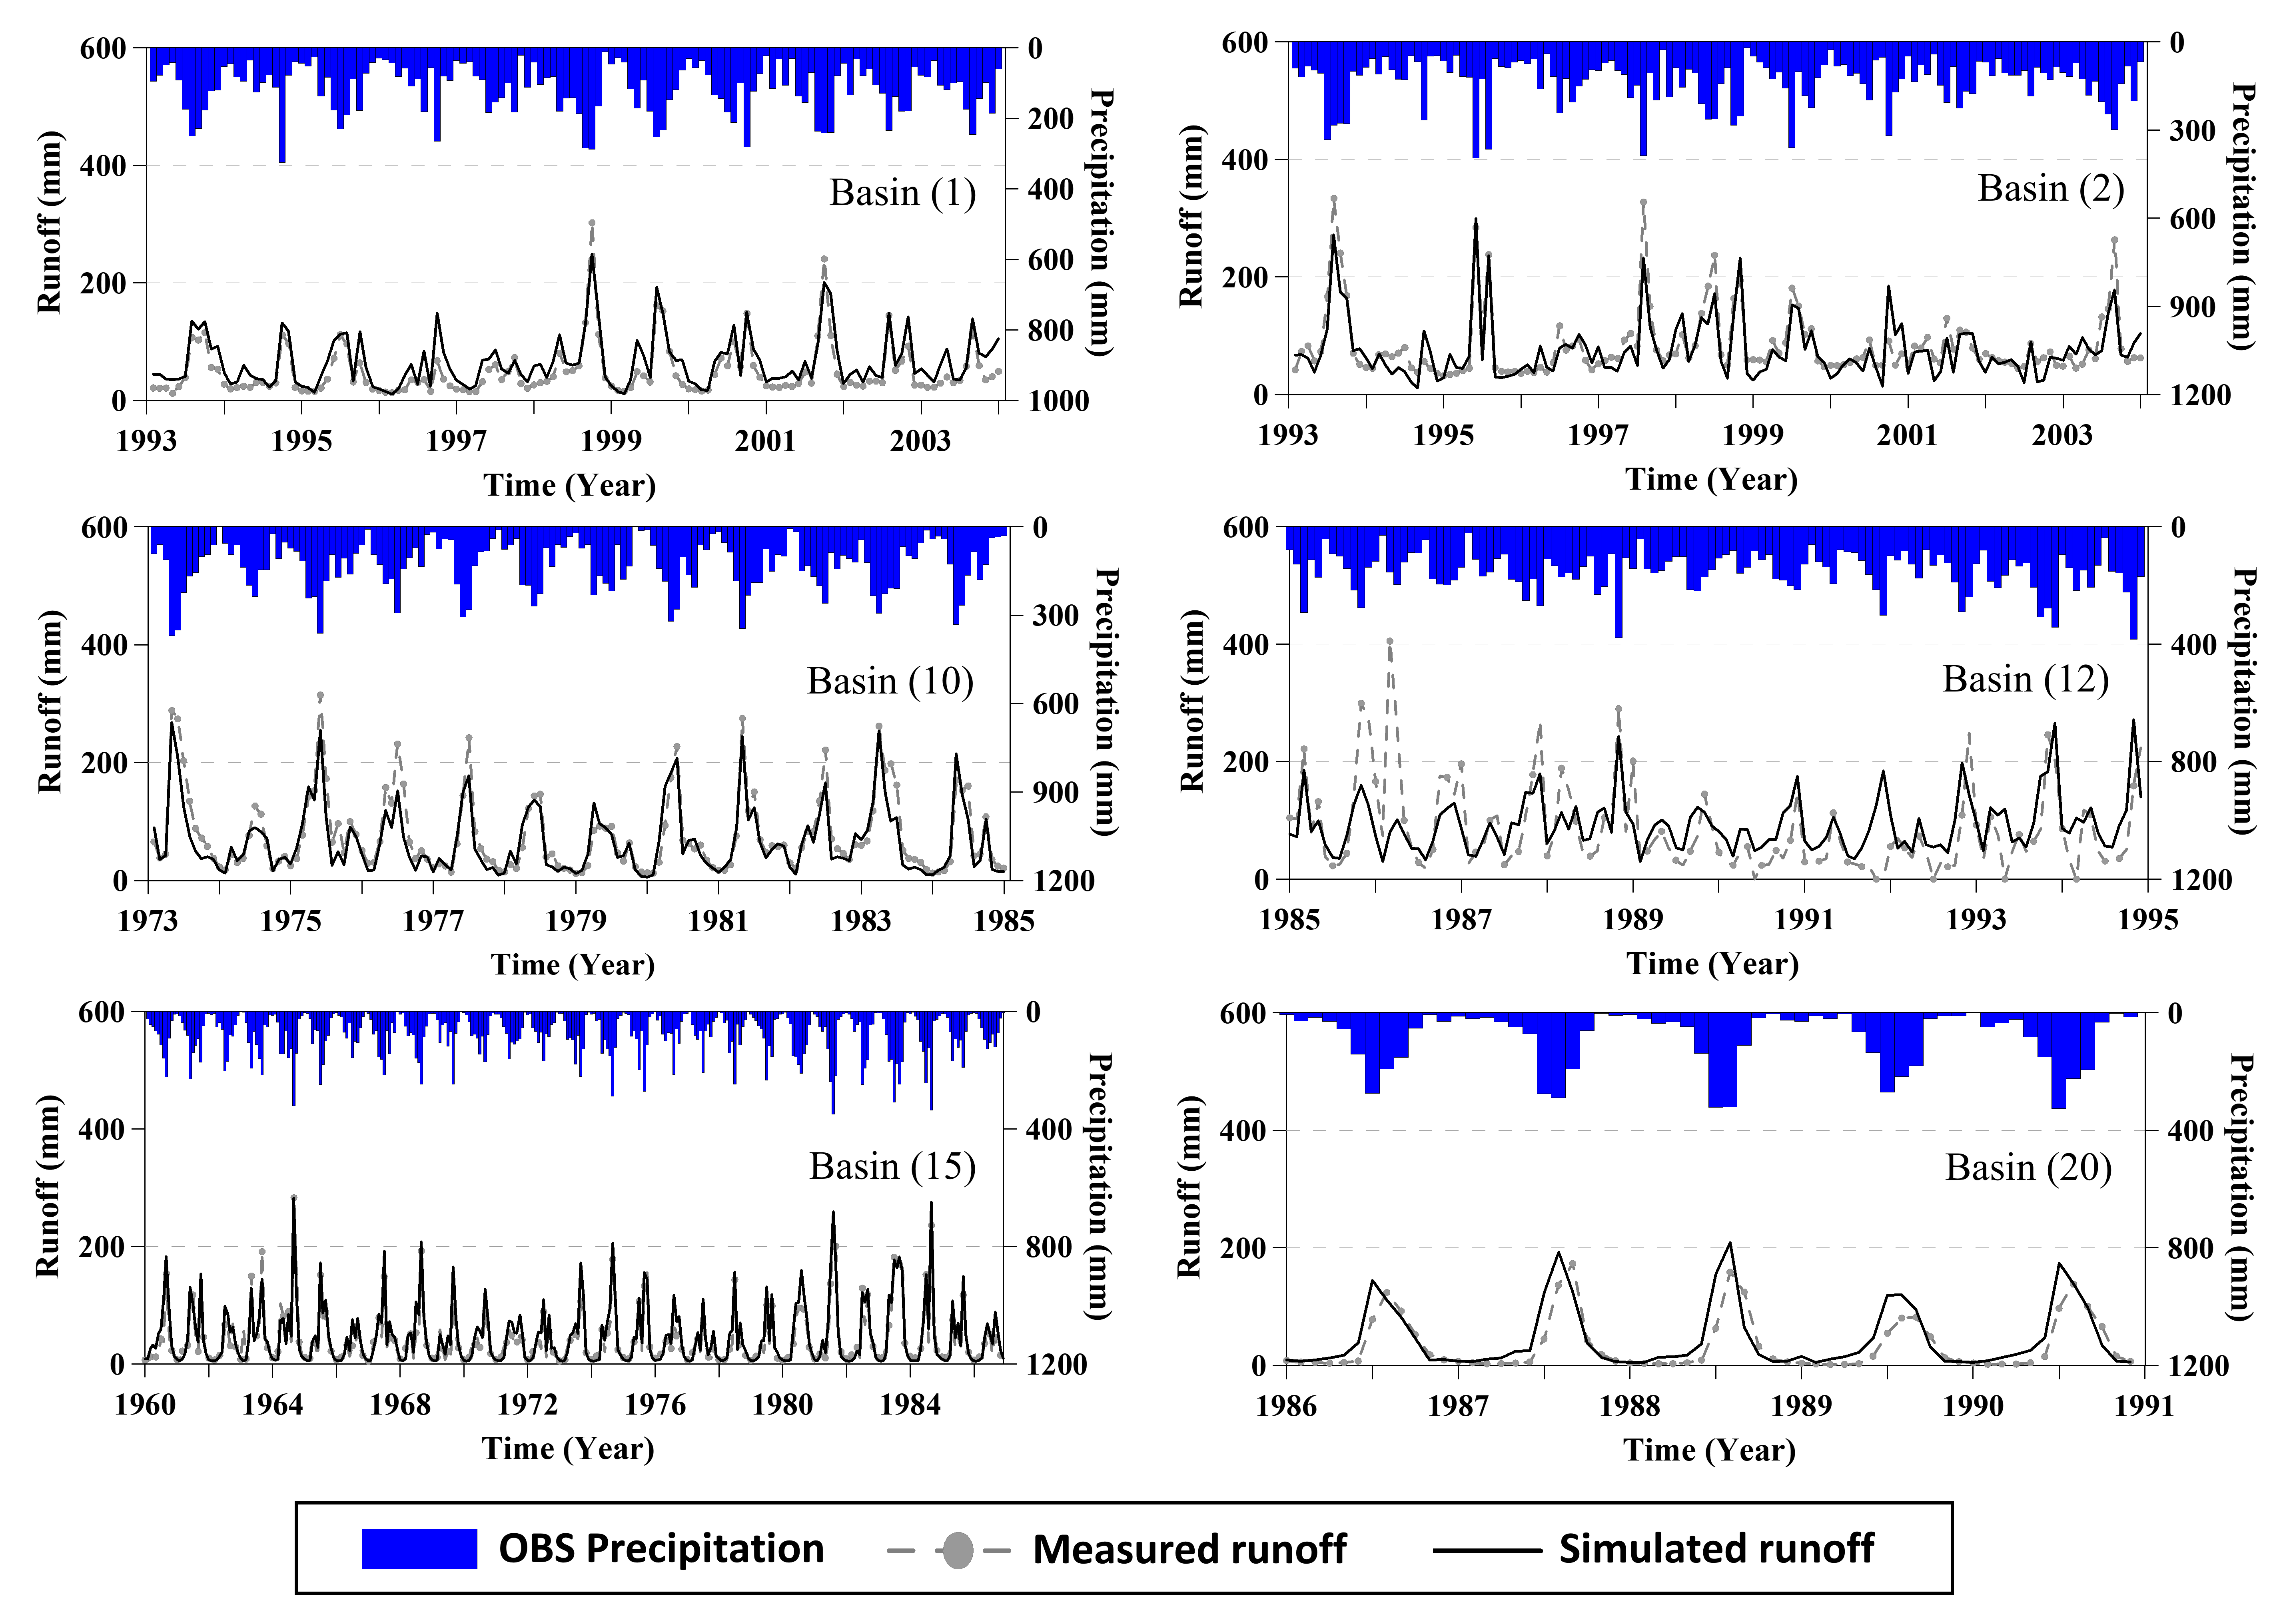

Supplement: Supplementary file 1 [file hess-24-5799-2020-supplement.zip › Fig_S3.tif]

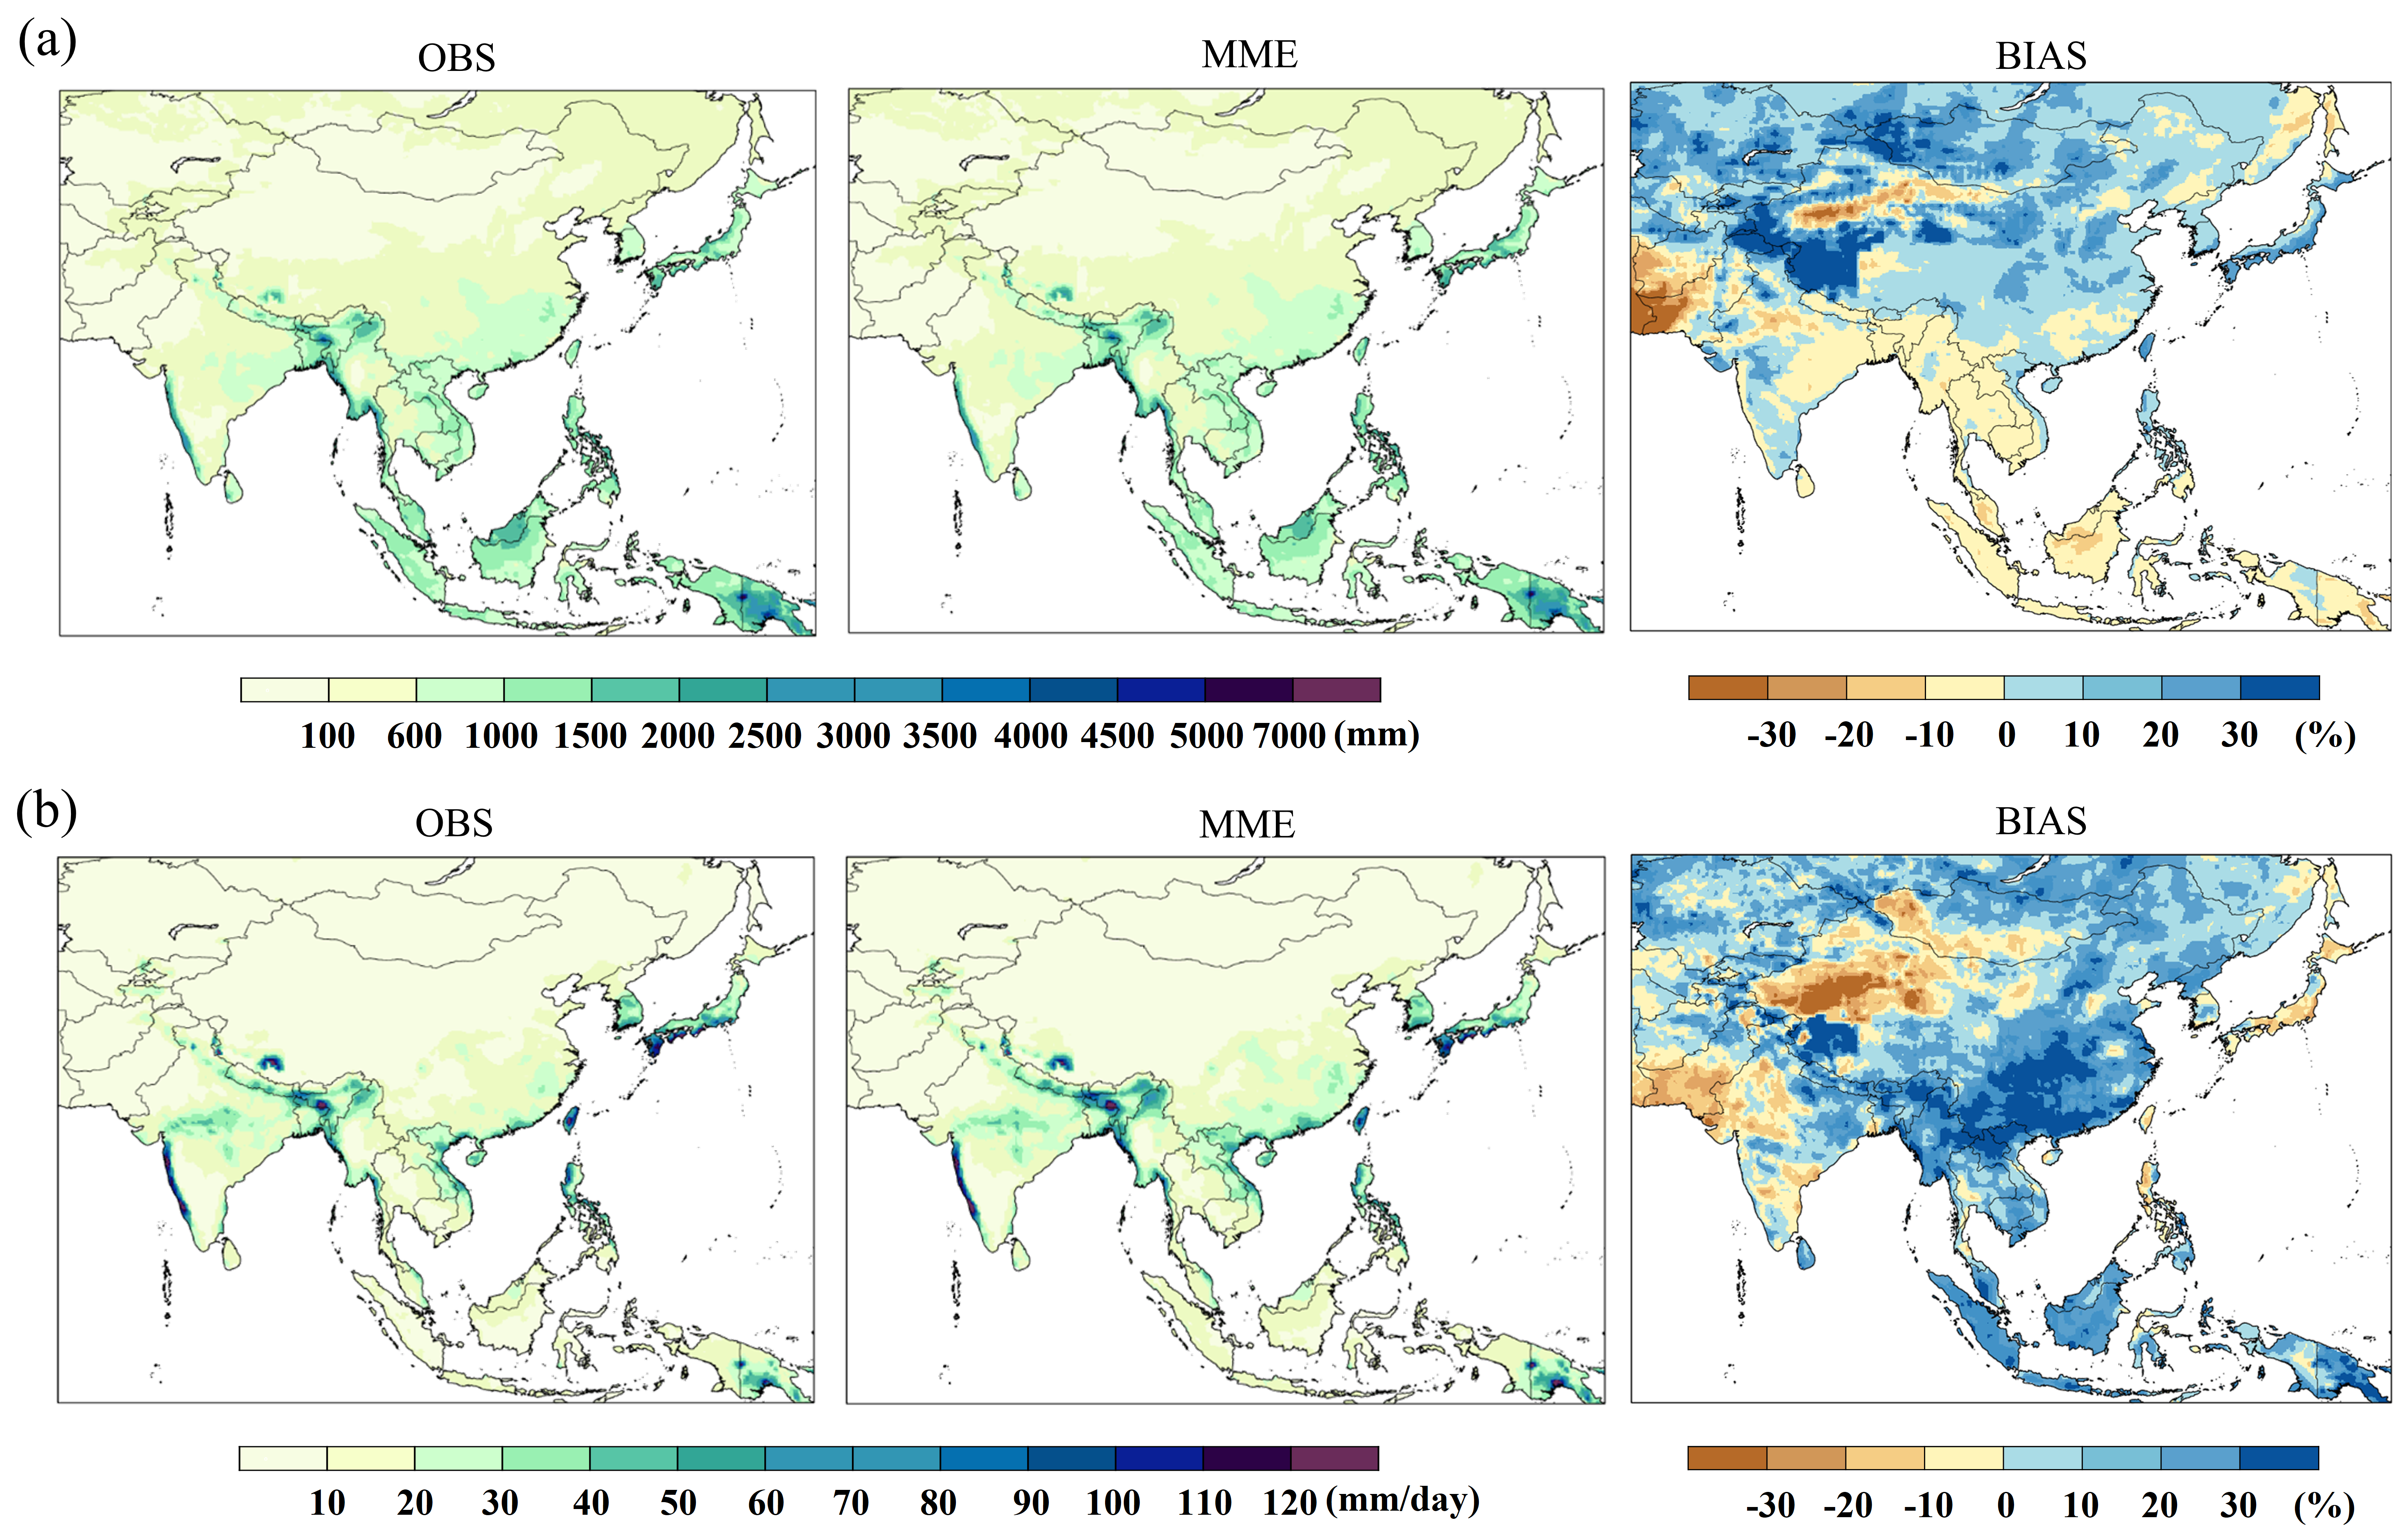

Supplement: Supplementary file 1 [file hess-24-5799-2020-supplement.zip › Fig_S6.tif]

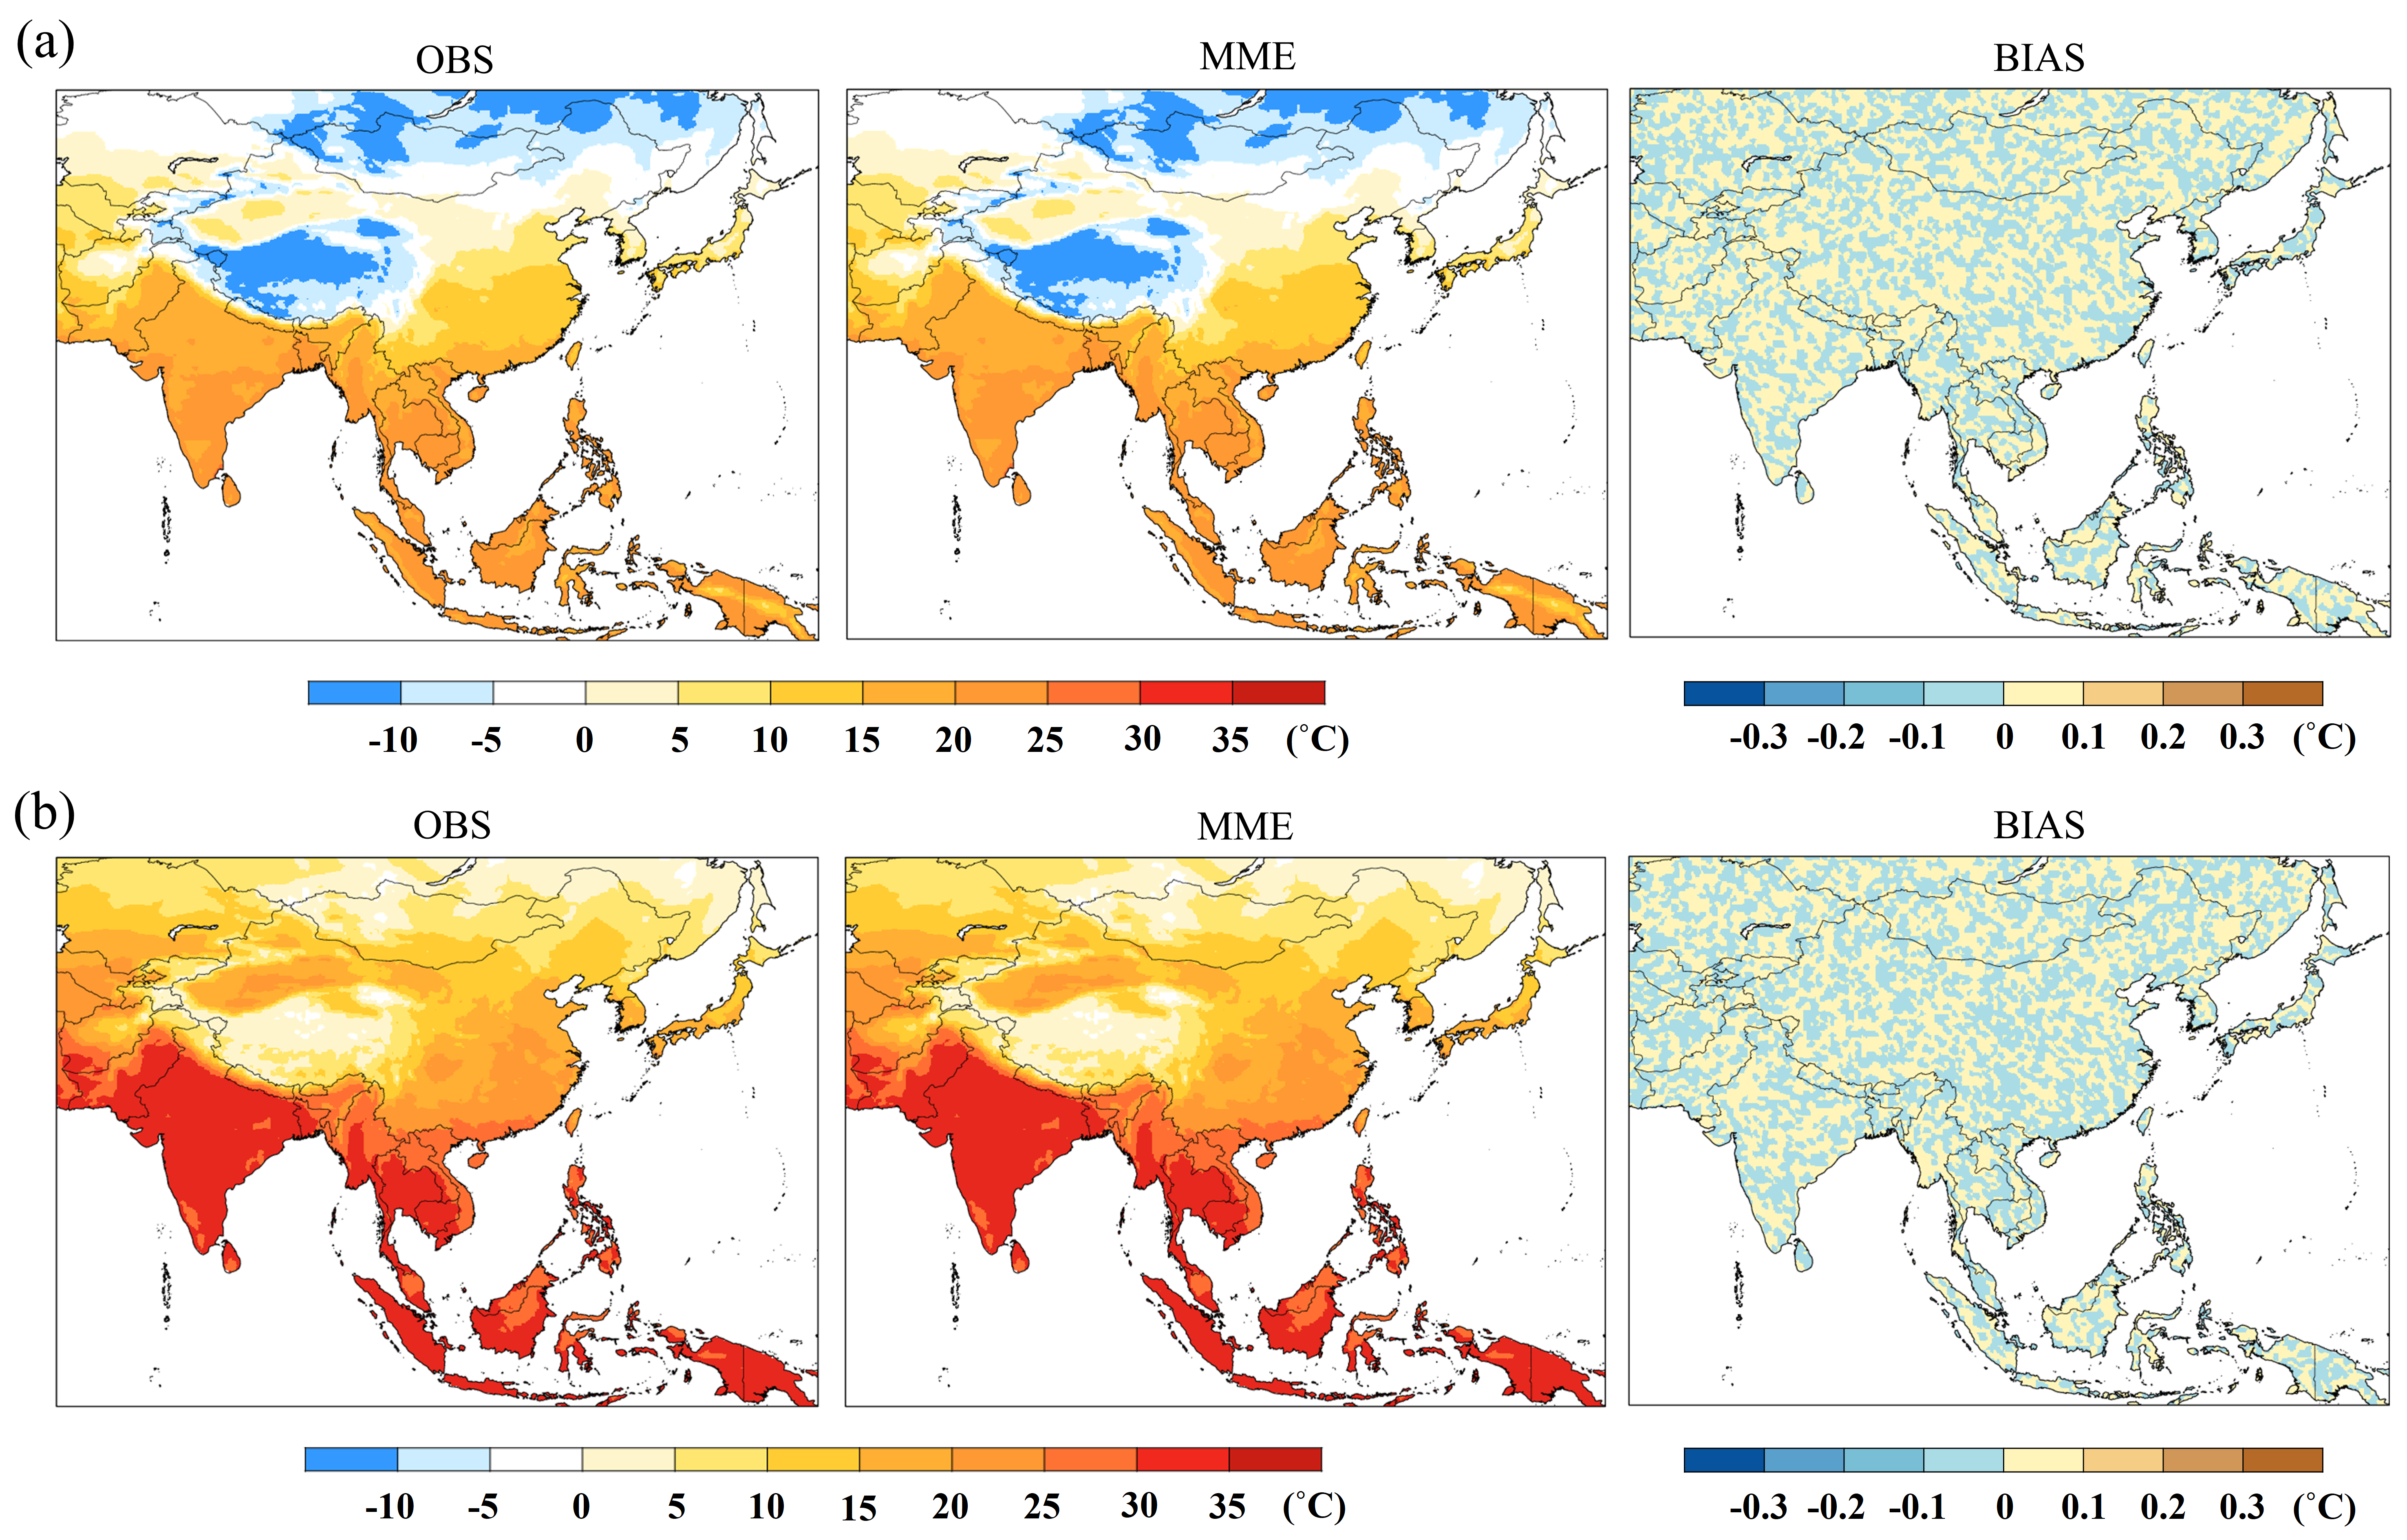

Supplement: Supplementary file 1 [file hess-24-5799-2020-supplement.zip › Fig_S5.tif]

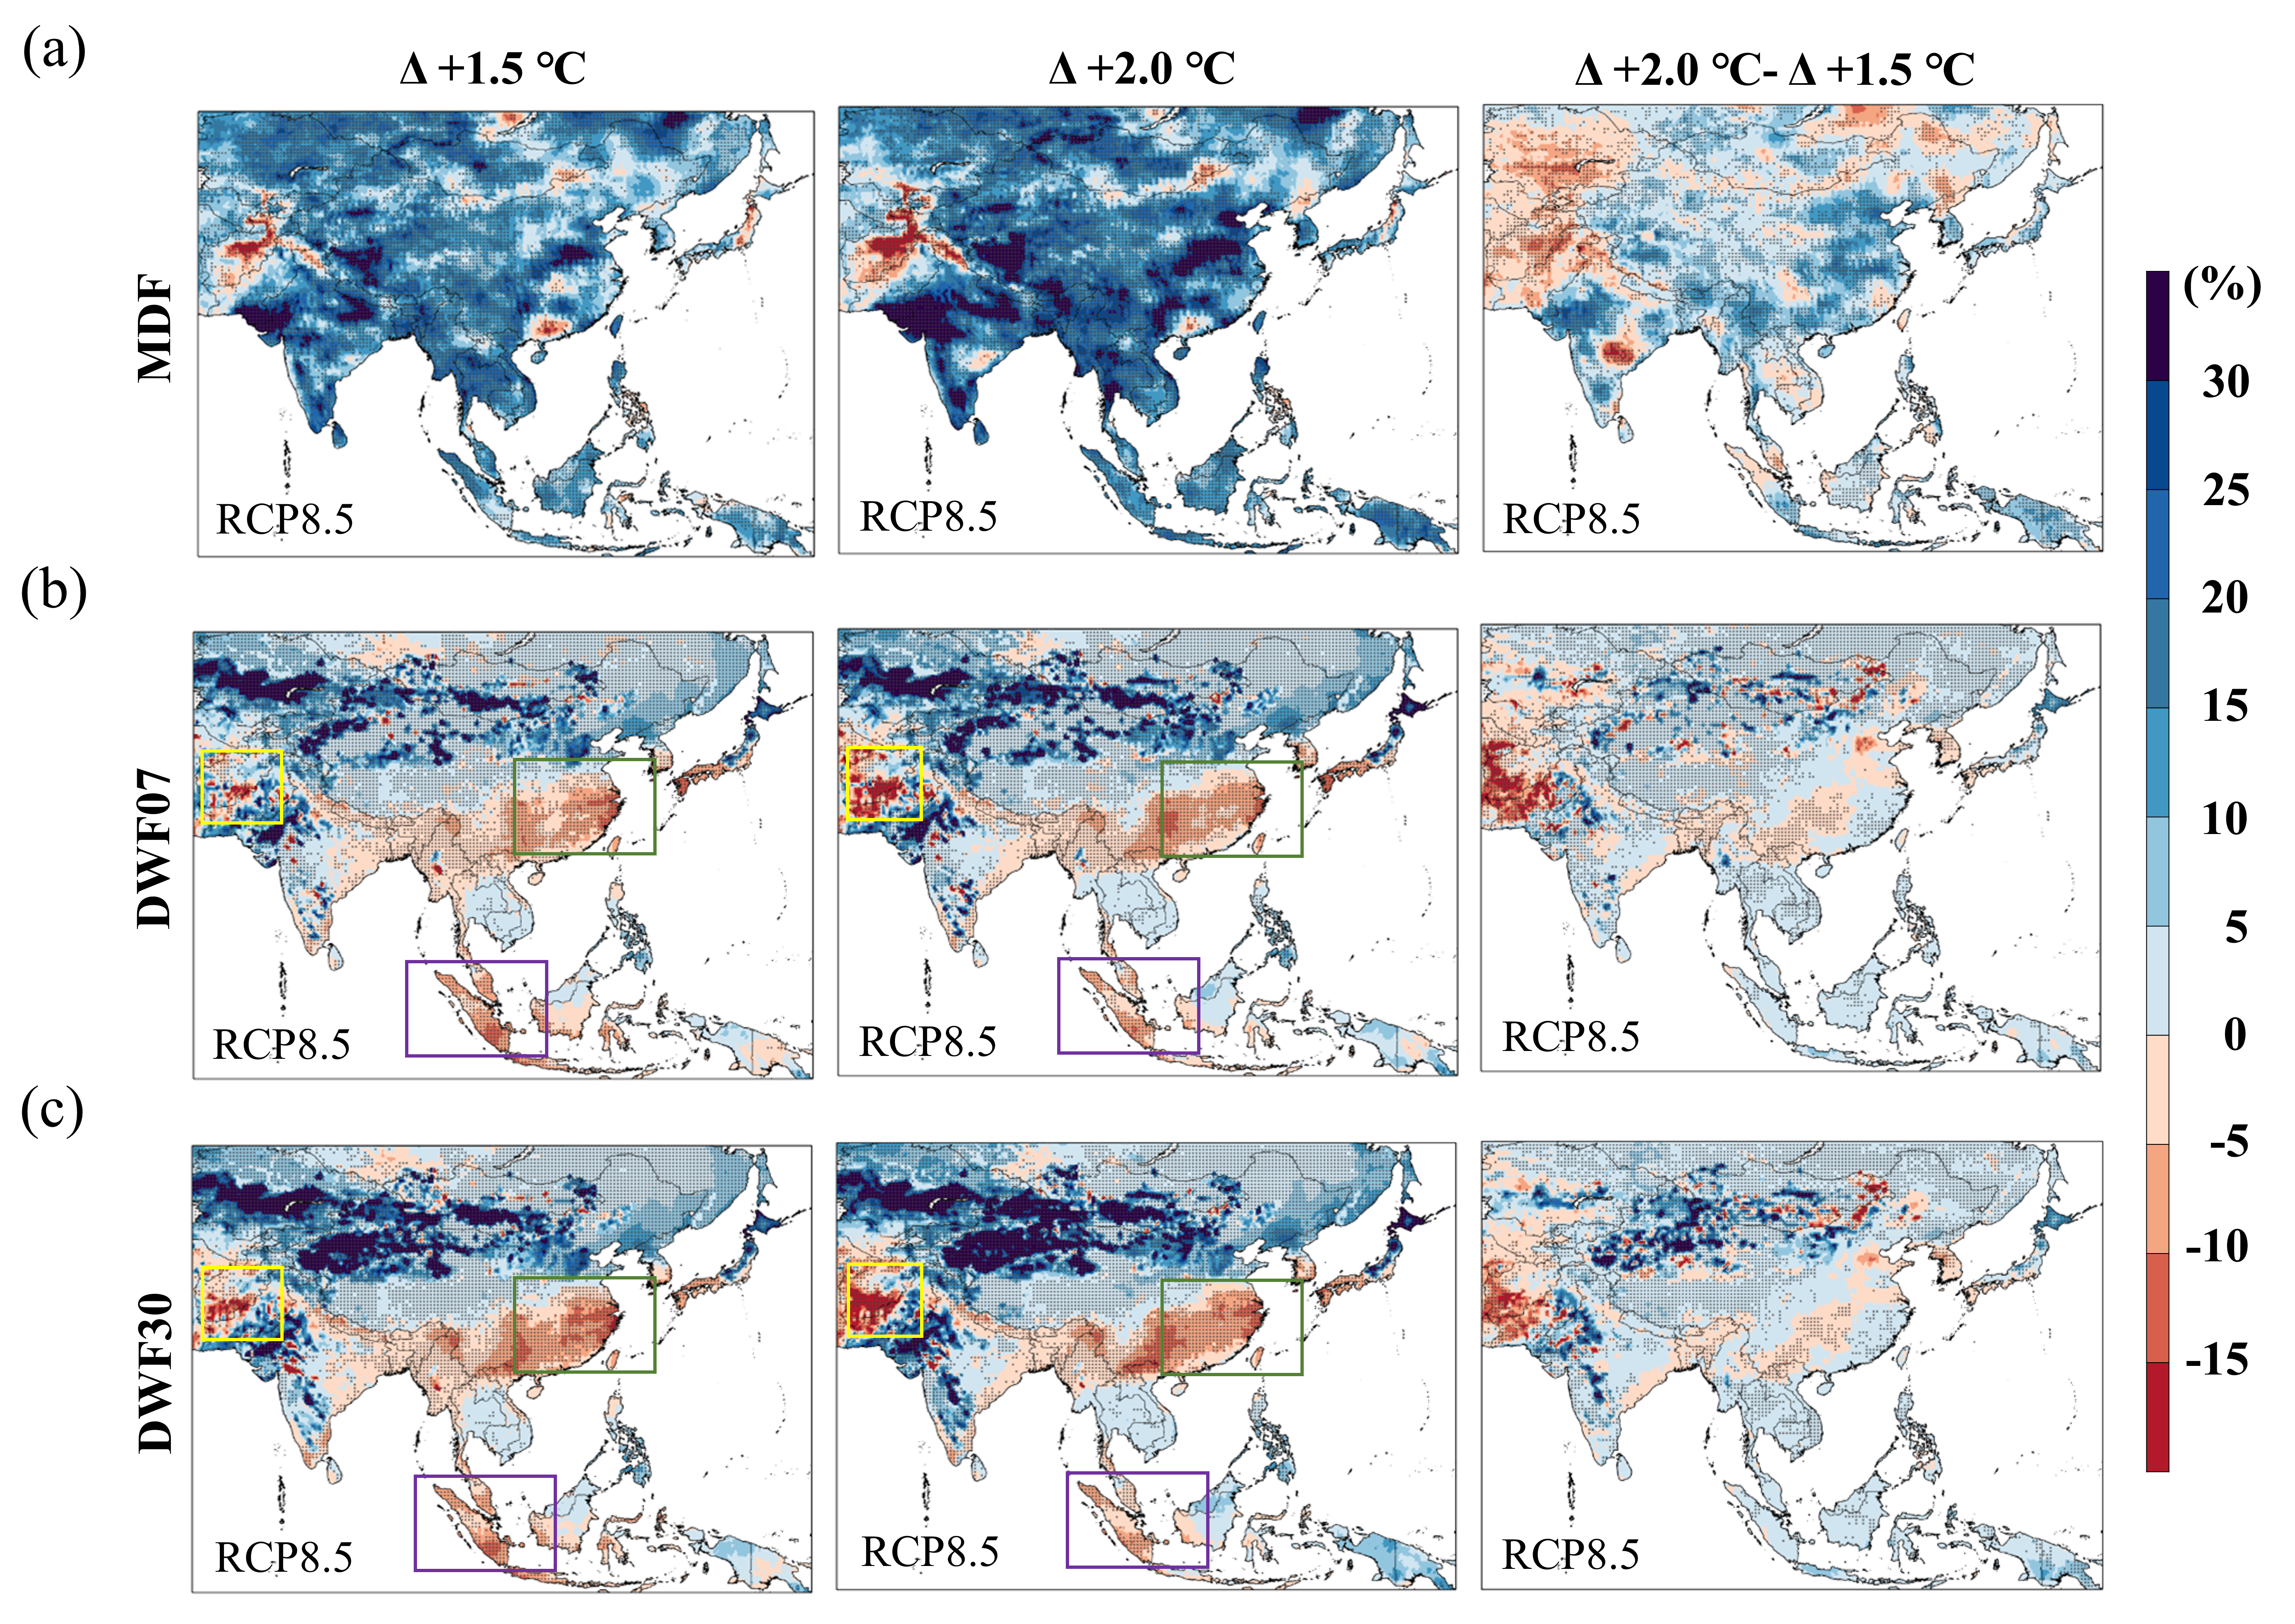

Supplement: Supplementary file 1 [file hess-24-5799-2020-supplement.zip › Fig_S8.tif]

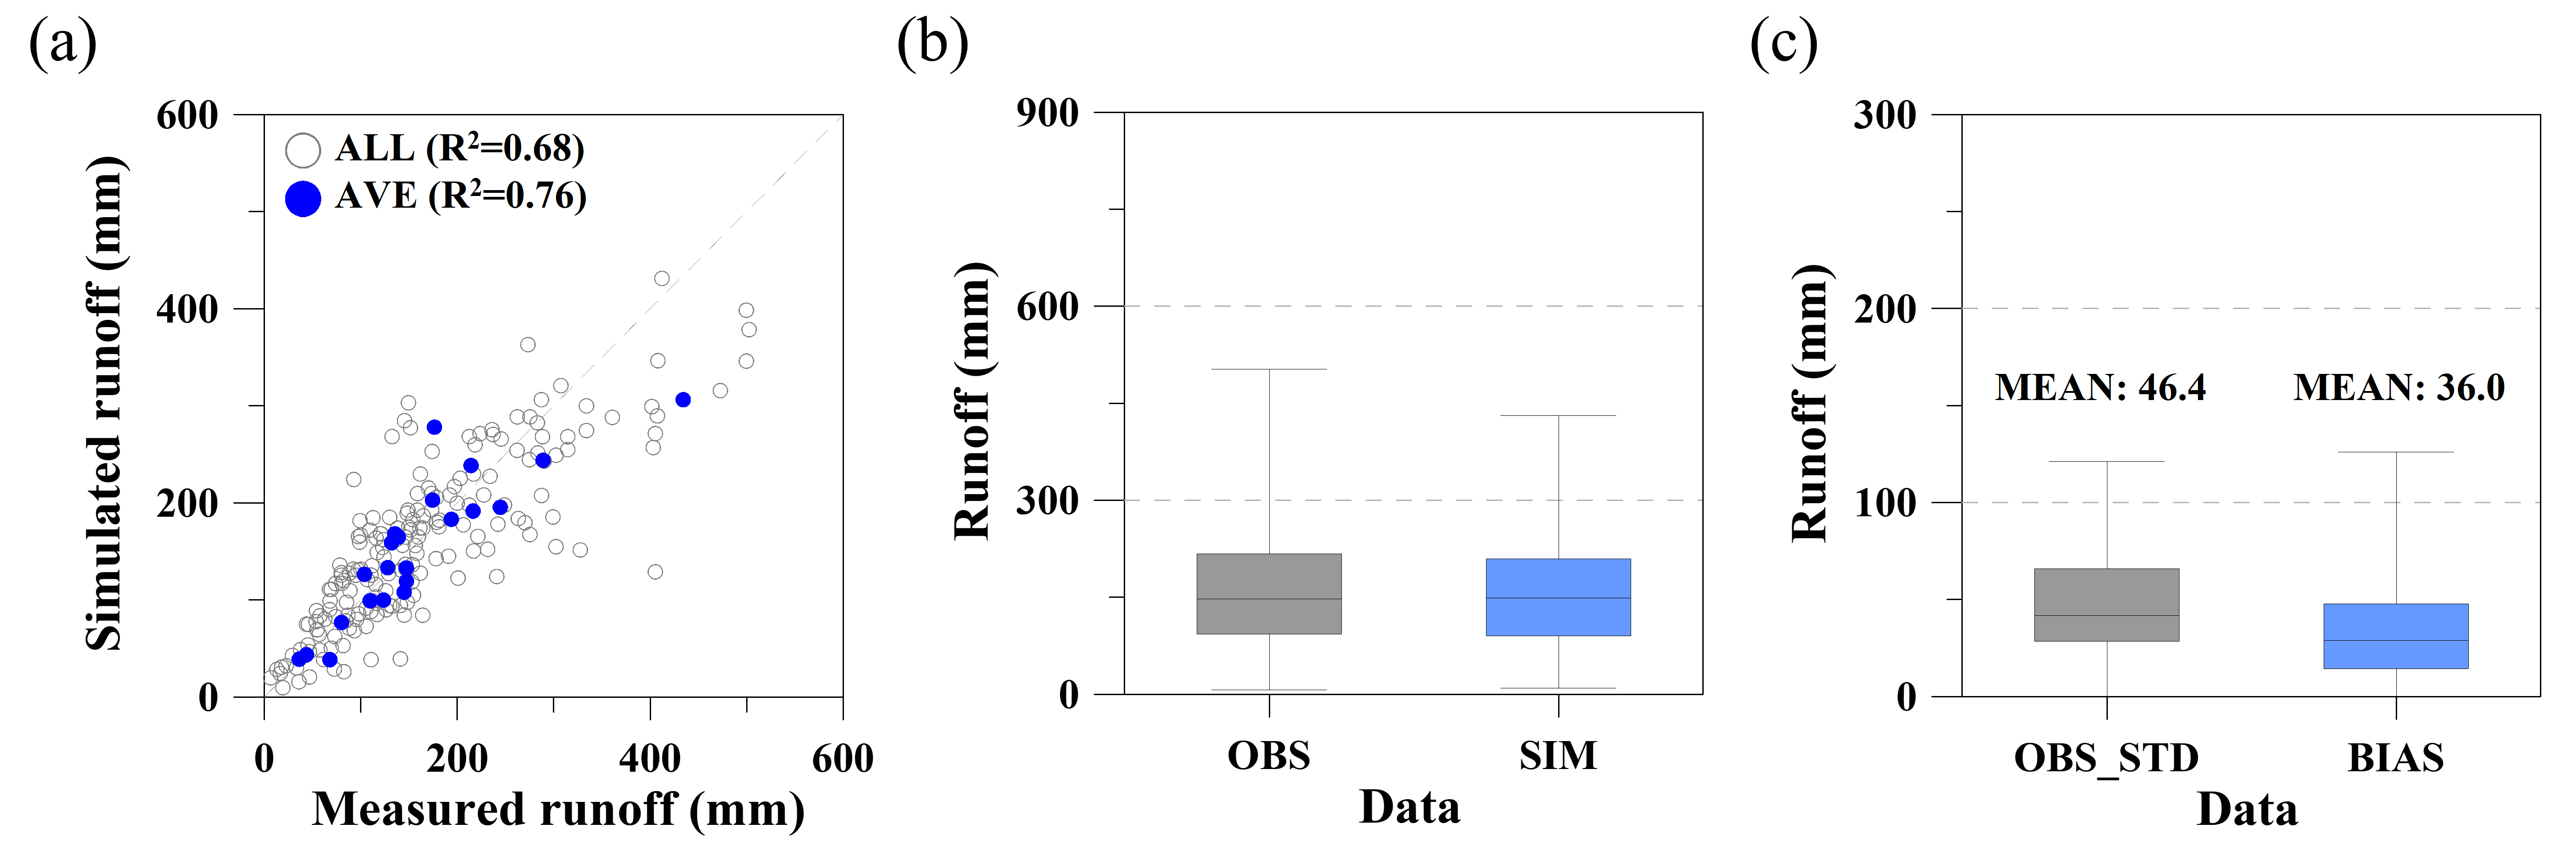

Supplement: Supplementary file 1 [file hess-24-5799-2020-supplement.zip › Fig_S4.tif]

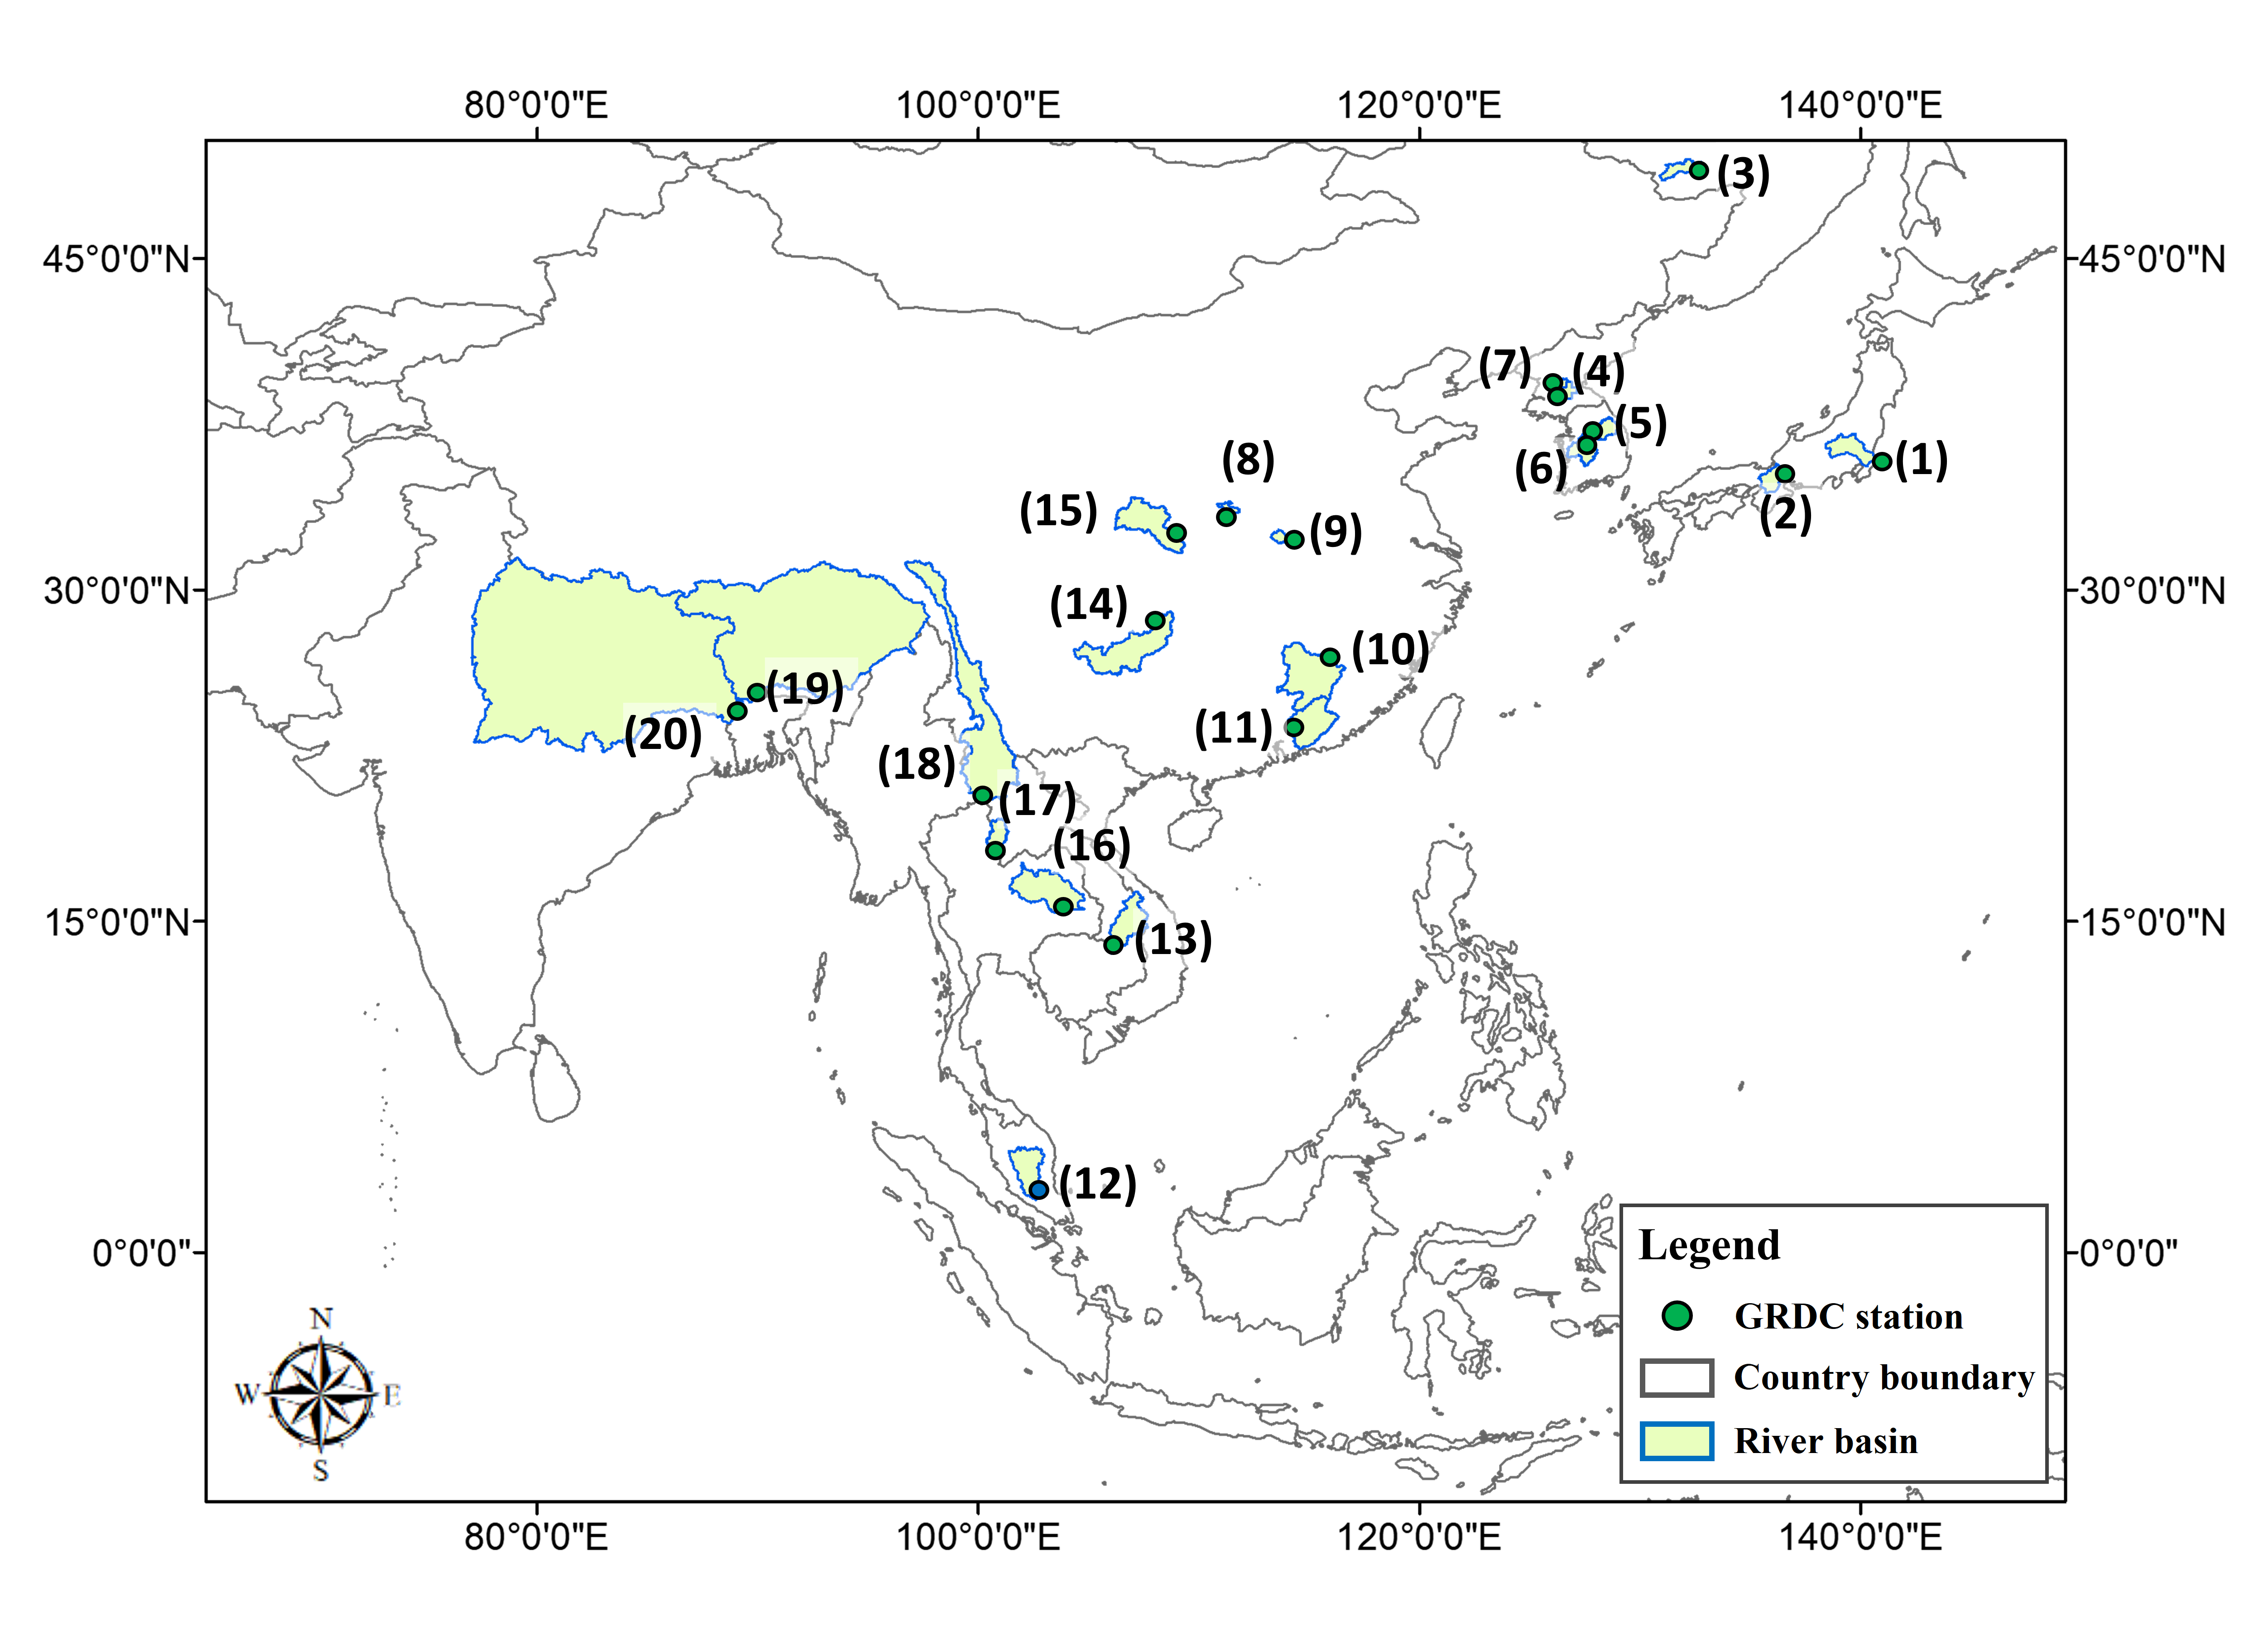

Supplement: Supplementary file 1 [file hess-24-5799-2020-supplement.zip › Fig_S2.tif]

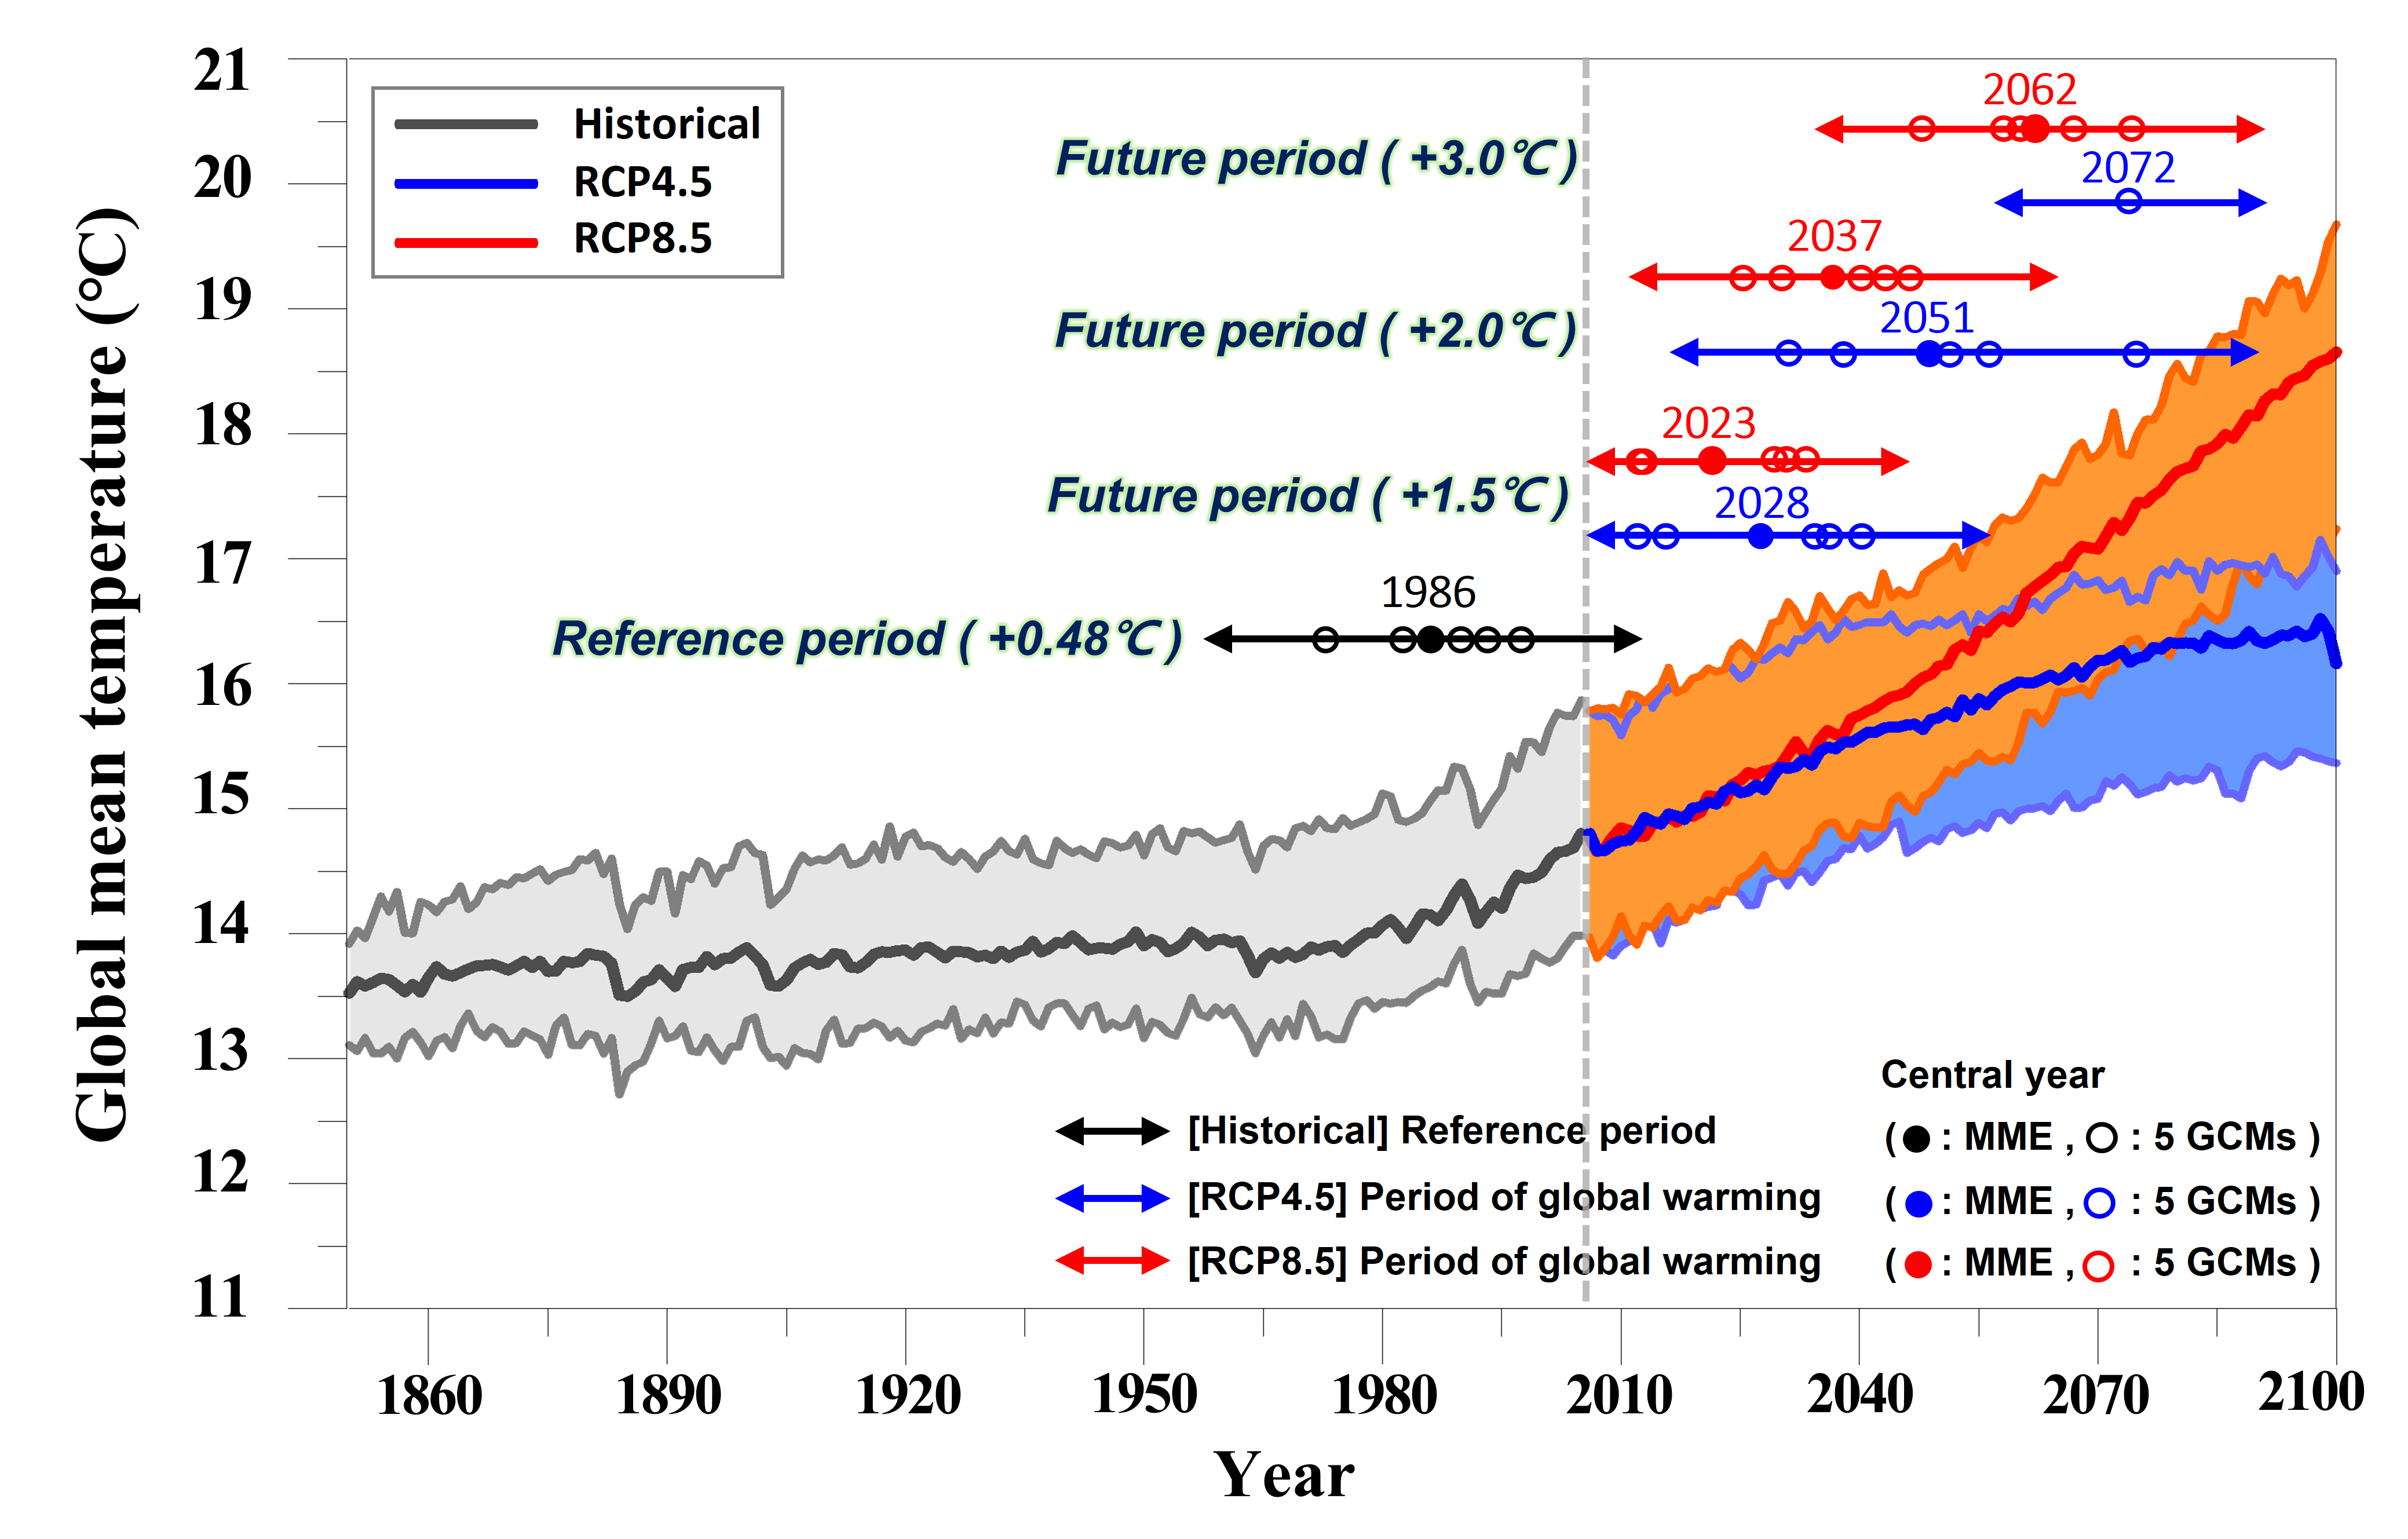

Supplement: Supplementary file 1 [file hess-24-5799-2020-supplement.zip › Fig_S1.tif]

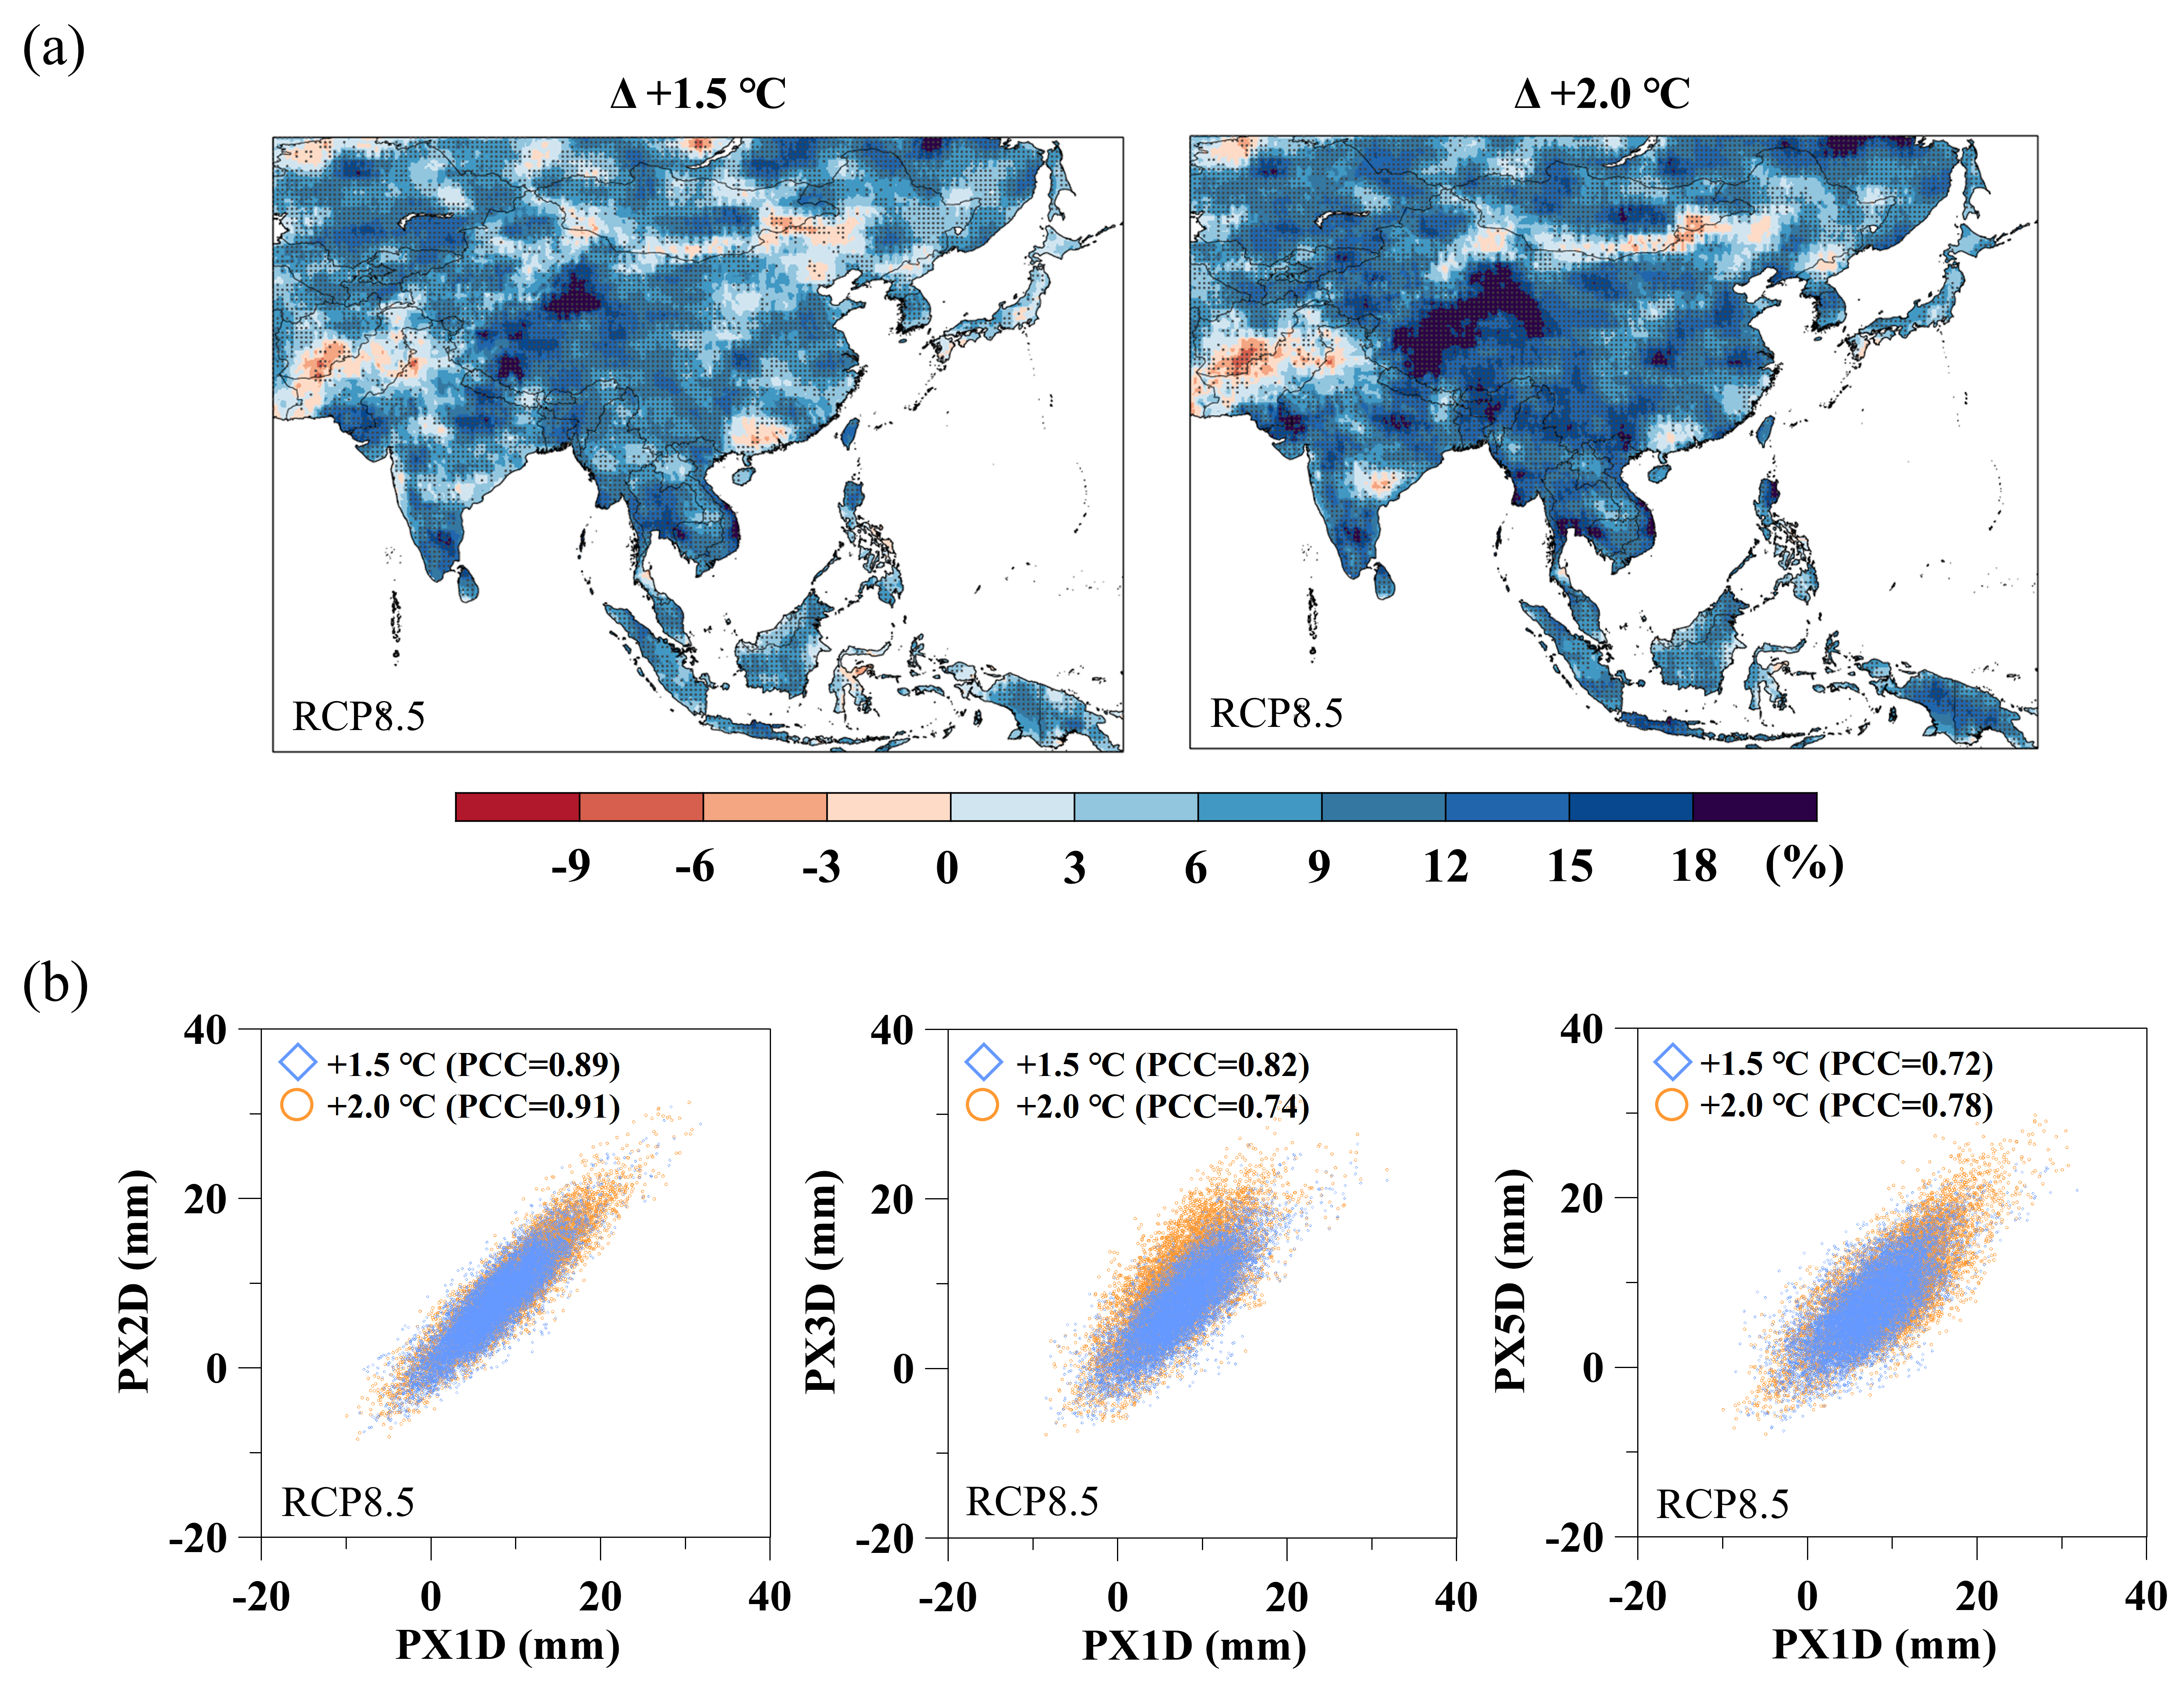

Supplement: Supplementary file 1 [file hess-24-5799-2020-supplement.zip › Fig_S7.tif]
